# Supplementary material for: Neoadjuvant cabozantinib restores CD8 T cells in patients with locally advanced non-metastatic clear cell renal cell carcinoma: a phase 2 trial
Source: Research Square preprint supplement (doi:10.21203/rs.3.rs-4849400/v1), 2024-08-08
Supplement: Supplementary file 1 [file 6fe5d335125be7d75b6a016a.xlsx]

## Sheet: List of Supplementary Table 
List of Supplementary Table
Supplementary Table 1. Clinical, Pathologic, and Immune Data
Supplementary Table 2. Summary of Cytokines with Response
Supplementary Table 3. Summary of Cytokines with Tumor Shrink 20
Supplementary Table 4. Summary of Cytokines with Tumor Shrink 25
Supplementary Table 5. Summary of Cytokines with Percentage Tumor Reduction
Supplementary Table 6. Summary of Wilcoxon Paired Rank Test on Absolute Values of FACS Markers
Supplementary Table 7. Summary of Wilcoxon Paired Rank Test on Fold Change Value of FACS Markers
Supplementary Table 8. Summary of FACS with Response
Supplementary Table 9. Summary of FACS with Tumor Shrink 20
Supplementary Table 10. Summary of FACS with Tumor Shrink 25
Supplementary Table 11. Summary of Cytokines with Percentage Tumor Reduction

## Sheet: Supplementary Table 1
Supplementary Table 1. Clinical, Pathologic, and Immune Data
Patient #	Clinical Stage	Best Response	Tumor Size (cm)	Pathologic Stage (ypT)	WHO/ISUP Grade	Therapy Related Changes	Necrosis	% CD8 of DAPI	% Niche	% Tumor Change
1	T3	PR	8.7	pT3a	2	(70%) Intra/peritumoral hyalinization, hemorrhage, calcifications, cholesterol clefts, foreign body-type giant cells, chronic inflammation, perivascular fibrosis/hyalinization	Yes	16.2382	16.4619	-34.8563
2	T3	PR	4.9	pT3b	4	(60%) Intra/peritumoral hyalinization, cystic changes, hemorrhage, chronic inflammation, perivascular fibrosis/hyalinization	Yes	18.0797	23.6527	-35.1351
3*	T3	SD	N/A	N/A	NA	Biopsy: Renal cell carcinoma with eosinophilic and clear cell features	No	NA	NA	NA
4	T3	SD	6.1	pT3a	4 (Rhabdoid and sarcomatoid)	(60%) Intra/peritumoral hyalinization, cystic changes, hemorrhage, chronic inflammation, perivascular fibrosis/hyalinization	Yes	12.9618	2.79487	-7.77626
5	T3	PR	11	pT3a	4 (Sarcomatoid)	(70%) Intra/peritumoral hyalinization, hemorrhage, calcifications, cholesterol clefts, foreign body-type giant cells, chronic inflammation, perivascular fibrosis/hyalinization	Yes	38.083	28.9883	-36.6776
6	T4	PR	10	pT3a	3	(70%) Intra/peritumoral hyalinization, cystic changes, hemorrhage, chronic inflammation, perivascular fibrosis/hyalinization	Yes	7.92986	13.3472	-39.0167
7	T3	SD	2	pT1a	2	(90%) Intra/peritumoral hyalinization, cystic changes, hemorrhage, chronic inflammation, perivascular fibrosis/hyalinization	No	9.22466	0.74295	-25.5193
8	T3	SD	7.7	pT3a	3	(60%) Intra/peritumoral hyalinization, hemorrhage, calcifications, chronic inflammation, perivascular fibrosis/hyalinization	Yes	2.53465	0.891107	-28.1798
9	T3	SD	5.7	pT1b	3	(30%) Intra/peritumoral hyalinization, hemorrhage, cholesterol clefts, foreign body-type giant cells, chronic inflammation, perivascular fibrosis/hyalinization	Yes	10.425	6.88348	-25.2089
10	T4	SD	12.5	pT4	4 (Rhabdoid and sarcomatoid)	(10%) Intra/peritumoral hyalinization, hemorrhage, chronic inflammation, perivascular fibrosis/hyalinization	Yes	4.39342	0.203579	-17.7386
11	T3	SD	9.5	pT3a	2	(70%) Intra/peritumoral hyalinization, cystic changes, hemorrhage, perivascular fibrosis/hyalinization	No	2.06009	0.0174429	-28.629
12	T3	SD	14.5	pT3a	4 (Sarcomatoid)	(30%) Intra/peritumoral hyalinization, hemorrhage, cholesterol clefts, foreign body-type giant cells, chronic inflammation, perivascular fibrosis/hyalinization	Yes	27.5919	16.4214	-14.1271
13	T3	PR	3	pT3a	3	(15%) Intra/peritumoral hyalinization, hemorrhage, chronic inflammation, perivascular fibrosis/hyalinization	No	12.6533	17.4945	-36.5559
14	T3	PR	5.2	pT3a	3	(30%) Intra/peritumoral hyalinization, cystic changes, hemorrhage, chronic inflammation, perivascular fibrosis/hyalinization	No	2.75624	1.10944	-41.8495
15	T3	SD	9.8	pT3c	3	(60%) Intra/peritumoral hyalinization, hemorrhage, calcifications, cystic changes, cholesterol clefts, foreign body-type giant cells, chronic inflammation, perivascular fibrosis/hyalinization	Yes	6.81937	3.83754	-22.8864
16	T3	SD	8.7	pT3a	2	(30%) Intra/peritumoral hyalinization, hemorrhage, cystic changes, cholesterol clefts, foreign body-type giant cells, chronic inflammation, perivascular fibrosis/hyalinization	Yes	16.4039	0.59769	-22.0056
17	T3	SD	10.5	pT3a	3	(20%) Intra/peritumoral hyalinization, hemorrhage, cystic changes, cholesterol clefts, foreign body-type giant cells, chronic inflammation, perivascular fibrosis/hyalinization	Yes	11.4433	4.5215	-14.7609
*, Patient #3 refused surgery due to personal reasons and received additional systemic treatment.

## Sheet: Supplementary Table 2
Supplementary Table 2. Summary of Cytokines with Response
			Best Response
Biomarkers	Covariate	Total N= 308 (100%)	PR N=110 (35.71%)	SD N=198 (64.29%)	P-value**
AFP	Mean Baseline				0.841*
	Total N	14	5	9
	Mean (Std Dev)	647.28 (217.18)	679.65 (199.36)	629.3 (236.12)
	Median (Q1-Q3)	596.04 (512.12-868.6)	624.01 (512.12-868.6)	568.07 (518.09-688.95)
	Min - Max	320.32-1072.15	482.82-910.69	320.32-1072.15
	W6D1 - folder change from Baseline				0.865*
	Total N	12	4	8
	Mean (Std Dev)	0.72 (0.28)	0.73 (0.37)	0.71 (0.26)
	Median (Q1-Q3)	0.69 (0.47-0.97)	0.67 (0.43-1.04)	0.69 (0.55-0.97)
	Min - Max	0.27-1.19	0.41-1.19	0.27-1
	N missing	2	1	1
	Post Tx - folder change from Baseline				0.734*
	Total N	12	4	8
	Mean (Std Dev)	0.87 (0.4)	0.91 (0.36)	0.86 (0.44)
	Median (Q1-Q3)	0.88 (0.56-1.01)	0.91 (0.69-1.13)	0.76 (0.56-1.01)
	Min - Max	0.4-1.79	0.47-1.35	0.4-1.79
	N missing	2	1	1
	Post Sx - folder change from Baseline				0.327*
	Total N	9	4	5
	Mean (Std Dev)	0.88 (0.3)	0.89 (0.47)	0.87 (0.1)
	Median (Q1-Q3)	0.81 (0.76-0.9)	0.77 (0.6-1.18)	0.86 (0.81-0.9)
	Min - Max	0.46-1.57	0.46-1.57	0.76-1.03
	N missing	5	1	4
AXL	Mean Baseline				0.386*
	Total N	14	5	9
	Mean (Std Dev)	1009.55 (447.41)	1125.02 (431.2)	945.4 (468.35)
	Median (Q1-Q3)	999.09 (664.14-1229.96)	1188.11 (987.07-1392.01)	971.15 (664.14-1039.63)
	Min - Max	357.85-1962.99	467.27-1590.65	357.85-1962.99
	W6D1 - folder change from Baseline				0.126*
	Total N	12	4	8
	Mean (Std Dev)	1.75 (0.81)	1.4 (0.24)	1.92 (0.95)
	Median (Q1-Q3)	1.67 (1.33-1.95)	1.36 (1.23-1.56)	1.79 (1.48-2.15)
	Min - Max	0.61-3.94	1.14-1.73	0.61-3.94
	N missing	2	1	1
	Post Tx - folder change from Baseline				0.61*
	Total N	12	4	8
	Mean (Std Dev)	1.82 (0.91)	1.67 (0.51)	1.89 (1.08)
	Median (Q1-Q3)	1.37 (1.35-2.42)	1.45 (1.37-1.97)	1.36 (1.32-2.69)
	Min - Max	0.58-3.85	1.36-2.44	0.58-3.85
	N missing	2	1	1
	Post Sx - folder change from Baseline				1*
	Total N	9	4	5
	Mean (Std Dev)	1.31 (0.44)	1.36 (0.47)	1.26 (0.47)
	Median (Q1-Q3)	1.3 (1.09-1.6)	1.23 (1.03-1.7)	1.3 (1.12-1.6)
	Min - Max	0.54-2.01	0.96-2.01	0.54-1.74
	N missing	5	1	4
Angiopoietin-1	Mean Baseline				0.947*
	Total N	14	5	9
	Mean (Std Dev)	1592.47 (1364.21)	1954.33 (2051.96)	1391.43 (889.74)
	Median (Q1-Q3)	1141.81 (720.65-2151.07)	1312.64 (720.65-1624.61)	970.99 (818.73-2151.07)
	Min - Max	326.77-5543.7	570.09-5543.7	326.77-2845.52
	W6D1 - folder change from Baseline				0.234*
	Total N	12	4	8
	Mean (Std Dev)	2.15 (2)	3.35 (3.24)	1.54 (0.7)
	Median (Q1-Q3)	1.89 (1.08-2.35)	2.35 (1.41-5.3)	1.45 (1.08-2.12)
	Min - Max	0.47-8.06	0.64-8.06	0.47-2.57
	N missing	2	1	1
	Post Tx - folder change from Baseline				0.042*
	Total N	12	4	8
	Mean (Std Dev)	1.86 (1.44)	3.19 (1.68)	1.2 (0.74)
	Median (Q1-Q3)	1.25 (0.85-2.37)	3.28 (1.76-4.62)	0.95 (0.68-1.71)
	Min - Max	0.53-4.78	1.42-4.78	0.53-2.4
	N missing	2	1	1
	Post Sx - folder change from Baseline				0.806*
	Total N	9	4	5
	Mean (Std Dev)	2.36 (4.97)	1.04 (0.95)	3.42 (6.75)
	Median (Q1-Q3)	0.47 (0.25-1.84)	1.05 (0.22-1.86)	0.47 (0.42-0.52)
	Min - Max	0.2-15.49	0.2-1.88	0.21-15.49
	N missing	5	1	4
Angiopoietin-2	Mean Baseline				0.028*
	Total N	14	5	9
	Mean (Std Dev)	2824.88 (2346.01)	1346.12 (444.53)	3646.41 (2592.07)
	Median (Q1-Q3)	1741.56 (1510.07-3518.99)	1510.07 (1117.81-1585.88)	2671.54 (1659.65-5068.47)
	Min - Max	693.39-9446.63	693.39-1823.48	1364.37-9446.63
	W6D1 - folder change from Baseline				0.865*
	Total N	12	4	8
	Mean (Std Dev)	0.76 (0.32)	0.75 (0.12)	0.76 (0.39)
	Median (Q1-Q3)	0.79 (0.54-0.89)	0.79 (0.68-0.81)	0.82 (0.42-0.92)
	Min - Max	0.27-1.49	0.57-0.83	0.27-1.49
	N missing	2	1	1
	Post Tx - folder change from Baseline				0.234*
	Total N	12	4	8
	Mean (Std Dev)	0.61 (0.28)	0.8 (0.27)	0.51 (0.24)
	Median (Q1-Q3)	0.65 (0.37-0.75)	0.7 (0.65-0.95)	0.48 (0.29-0.75)
	Min - Max	0.2-1.2	0.62-1.2	0.2-0.83
	N missing	2	1	1
	Post Sx - folder change from Baseline				0.462*
	Total N	9	4	5
	Mean (Std Dev)	1.04 (0.32)	1.11 (0.28)	0.98 (0.37)
	Median (Q1-Q3)	1.03 (0.77-1.22)	1.12 (0.9-1.33)	0.93 (0.65-1.17)
	Min - Max	0.64-1.51	0.77-1.44	0.64-1.51
	N missing	5	1	4
CEA	Mean Baseline				0.317*
	Total N	14	5	9
	Mean (Std Dev)	596.06 (807.92)	435.09 (228.6)	685.49 (1004.67)
	Median (Q1-Q3)	256.98 (161.34-659.15)	411.72 (270.79-659.15)	199.76 (130.79-373.18)
	Min - Max	35.29-2475.76	161.34-672.47	35.29-2475.76
	W6D1 - folder change from Baseline				0.497*
	Total N	12	4	8
	Mean (Std Dev)	1.12 (0.62)	1.45 (0.76)	0.96 (0.52)
	Median (Q1-Q3)	1.02 (0.8-1.39)	1.16 (0.93-1.96)	1.02 (0.51-1.28)
	Min - Max	0.27-2.55	0.92-2.55	0.27-1.8
	N missing	2	1	1
	Post Tx - folder change from Baseline				0.734*
	Total N	12	4	8
	Mean (Std Dev)	1.59 (1.22)	1.31 (0.31)	1.73 (1.49)
	Median (Q1-Q3)	1.28 (1.06-1.77)	1.32 (1.06-1.57)	1.28 (0.87-1.97)
	Min - Max	0.42-5.14	0.98-1.63	0.42-5.14
	N missing	2	1	1
	Post Sx - folder change from Baseline				0.327*
	Total N	9	4	5
	Mean (Std Dev)	1.19 (0.71)	0.92 (0.29)	1.41 (0.9)
	Median (Q1-Q3)	0.94 (0.75-1.27)	0.84 (0.71-1.13)	1.11 (0.91-1.27)
	Min - Max	0.69-2.97	0.69-1.33	0.75-2.97
	N missing	5	1	4
Eotaxin-3	Mean Baseline				0.841*
	Total N	14	5	9
	Mean (Std Dev)	6.21 (1.93)	6.22 (0.94)	6.2 (2.37)
	Median (Q1-Q3)	6.26 (4.96-7.29)	6.3 (5.55-6.94)	6.23 (4.37-8.07)
	Min - Max	3.3-9.8	5.03-7.29	3.3-9.8
	W6D1 - folder change from Baseline				0.011*
	Total N	12	4	8
	Mean (Std Dev)	1.24 (0.22)	1.03 (0.21)	1.34 (0.13)
	Median (Q1-Q3)	1.23 (1.14-1.4)	1.12 (0.91-1.14)	1.35 (1.23-1.45)
	Min - Max	0.71-1.52	0.71-1.16	1.15-1.52
	N missing	2	1	1
	Post Tx - folder change from Baseline				0.396*
	Total N	12	4	8
	Mean (Std Dev)	0.98 (0.15)	1.03 (0.21)	0.95 (0.12)
	Median (Q1-Q3)	0.98 (0.86-1.08)	1.07 (0.89-1.16)	0.98 (0.86-1.02)
	Min - Max	0.74-1.23	0.74-1.23	0.77-1.1
	N missing	2	1	1
	Post Sx - folder change from Baseline				0.806*
	Total N	9	4	5
	Mean (Std Dev)	0.84 (0.19)	0.83 (0.17)	0.86 (0.23)
	Median (Q1-Q3)	0.82 (0.68-1)	0.84 (0.68-0.97)	0.82 (0.68-1.04)
	Min - Max	0.61-1.13	0.62-1	0.61-1.13
	N missing	5	1	4
GAS6	Mean Baseline				0.072*
	Total N	14	5	9
	Mean (Std Dev)	6638.06 (2504.84)	5348.37 (1452.66)	7354.54 (2742.88)
	Median (Q1-Q3)	6259.67 (4718.98-7067.1)	4547.72 (4505.04-6835.56)	6971.89 (5311.03-8466.67)
	Min - Max	3867.19-12921.84	3867.19-6986.36	4718.98-12921.84
	W6D1 - folder change from Baseline				0.61*
	Total N	12	4	8
	Mean (Std Dev)	1.78 (0.67)	1.61 (0.71)	1.86 (0.68)
	Median (Q1-Q3)	1.7 (1.22-2.22)	1.66 (1.01-2.22)	1.7 (1.42-2.22)
	Min - Max	0.89-3.16	0.89-2.25	0.99-3.16
	N missing	2	1	1
	Post Tx - folder change from Baseline				0.308*
	Total N	12	4	8
	Mean (Std Dev)	1.36 (0.54)	1.14 (0.34)	1.47 (0.61)
	Median (Q1-Q3)	1.18 (0.98-1.6)	1.02 (0.89-1.38)	1.21 (1.11-1.94)
	Min - Max	0.77-2.49	0.89-1.62	0.77-2.49
	N missing	2	1	1
	Post Sx - folder change from Baseline				0.086*
	Total N	9	4	5
	Mean (Std Dev)	0.69 (0.19)	0.82 (0.13)	0.59 (0.16)
	Median (Q1-Q3)	0.68 (0.58-0.81)	0.83 (0.71-0.93)	0.58 (0.48-0.68)
	Min - Max	0.4-0.95	0.66-0.95	0.4-0.81
	N missing	5	1	4
HGF	Mean Baseline				0.689*
	Total N	14	5	9
	Mean (Std Dev)	71.42 (34.91)	64.21 (18.19)	75.43 (42.01)
	Median (Q1-Q3)	64.74 (44.19-101.76)	62.13 (54.6-67.35)	78.21 (44.19-117.7)
	Min - Max	7.29-121.27	44.19-92.77	7.29-121.27
	W6D1 - folder change from Baseline				1*
	Total N	12	4	8
	Mean (Std Dev)	1.07 (0.44)	0.99 (0.24)	1.11 (0.52)
	Median (Q1-Q3)	0.99 (0.81-1.21)	0.99 (0.84-1.14)	1.03 (0.81-1.21)
	Min - Max	0.52-2.25	0.7-1.29	0.52-2.25
	N missing	2	1	1
	Post Tx - folder change from Baseline				0.027*
	Total N	12	4	8
	Mean (Std Dev)	13.3 (33.09)	38.4 (52.5)	0.76 (0.25)
	Median (Q1-Q3)	0.98 (0.55-1.17)	20.07 (1.13-75.66)	0.72 (0.53-1.02)
	Min - Max	0.5-112.5	0.94-112.5	0.5-1.02
	N missing	2	1	1
	Post Sx - folder change from Baseline				1*
	Total N	9	4	5
	Mean (Std Dev)	0.88 (0.32)	0.92 (0.34)	0.84 (0.35)
	Median (Q1-Q3)	0.88 (0.8-1.03)	0.89 (0.67-1.17)	0.88 (0.88-1.03)
	Min - Max	0.25-1.36	0.55-1.36	0.25-1.15
	N missing	5	1	4
I-TAC	Mean Baseline				0.641*
	Total N	14	5	9
	Mean (Std Dev)	7.81 (3.81)	6.4 (3.22)	8.6 (4.05)
	Median (Q1-Q3)	6.93 (6.07-10.21)	6.57 (6.52-7.4)	7.29 (6.07-13.1)
	Min - Max	1.31-14.6	1.31-10.21	3.09-14.6
	W6D1 - folder change from Baseline				0.396*
	Total N	12	4	8
	Mean (Std Dev)	2.13 (1.03)	2.57 (1.42)	1.92 (0.8)
	Median (Q1-Q3)	1.96 (1.41-2.53)	2.08 (1.72-3.42)	1.86 (1.19-2.53)
	Min - Max	0.99-4.65	1.46-4.65	0.99-3.18
	N missing	2	1	1
	Post Tx - folder change from Baseline				0.234*
	Total N	12	4	8
	Mean (Std Dev)	1.45 (0.72)	1.89 (0.96)	1.24 (0.51)
	Median (Q1-Q3)	1.24 (1.02-1.71)	1.59 (1.18-2.59)	1.18 (0.94-1.43)
	Min - Max	0.54-3.21	1.15-3.21	0.54-2.28
	N missing	2	1	1
	Post Sx - folder change from Baseline				0.327*
	Total N	9	4	5
	Mean (Std Dev)	0.98 (0.42)	0.81 (0.29)	1.12 (0.49)
	Median (Q1-Q3)	0.9 (0.75-1.27)	0.84 (0.61-1.01)	1.27 (0.75-1.42)
	Min - Max	0.44-1.66	0.44-1.13	0.48-1.66
	N missing	5	1	4
IGF-I	Mean Baseline				0.317*
	Total N	14	5	9
	Mean (Std Dev)	59945.01 (16692.24)	65199.05 (14680)	57026.11 (17837.77)
	Median (Q1-Q3)	59386.73 (50785.7-64716.15)	64716.15 (53236.7-71395.75)	58719.95 (50785.7-64478.8)
	Min - Max	27380.45-92812.55	50147-86499.65	27380.45-92812.55
	W6D1 - folder change from Baseline				0.042*
	Total N	12	4	8
	Mean (Std Dev)	0.81 (0.16)	0.94 (0.09)	0.74 (0.14)
	Median (Q1-Q3)	0.86 (0.64-0.9)	0.9 (0.89-1)	0.71 (0.62-0.86)
	Min - Max	0.57-1.08	0.88-1.08	0.57-0.96
	N missing	2	1	1
	Post Tx - folder change from Baseline				0.61*
	Total N	12	4	8
	Mean (Std Dev)	0.73 (0.16)	0.71 (0.19)	0.75 (0.16)
	Median (Q1-Q3)	0.77 (0.61-0.8)	0.68 (0.57-0.85)	0.8 (0.65-0.8)
	Min - Max	0.47-1	0.53-0.97	0.47-1
	N missing	2	1	1
	Post Sx - folder change from Baseline				0.462*
	Total N	9	4	5
	Mean (Std Dev)	1.25 (0.37)	1.36 (0.34)	1.16 (0.4)
	Median (Q1-Q3)	1.26 (0.95-1.54)	1.35 (1.11-1.61)	1.17 (0.93-1.54)
	Min - Max	0.61-1.77	0.95-1.77	0.61-1.54
	N missing	5	1	4
IP-10	Mean Baseline				0.257*
	Total N	14	5	9
	Mean (Std Dev)	81.88 (36.9)	66.96 (33.46)	90.17 (37.9)
	Median (Q1-Q3)	77.47 (50.91-113.78)	50.91 (40.83-89.3)	97.53 (64.16-113.78)
	Min - Max	35.41-149.3	39.21-114.58	35.41-149.3
	W6D1 - folder change from Baseline				0.308*
	Total N	12	4	8
	Mean (Std Dev)	1.93 (1.2)	2.71 (1.69)	1.55 (0.73)
	Median (Q1-Q3)	1.55 (1.16-2.42)	2.67 (1.25-4.16)	1.51 (1.15-1.88)
	Min - Max	0.38-4.36	1.12-4.36	0.38-2.87
	N missing	2	1	1
	Post Tx - folder change from Baseline				0.61*
	Total N	12	4	8
	Mean (Std Dev)	1.28 (0.5)	1.46 (0.69)	1.19 (0.39)
	Median (Q1-Q3)	1.22 (0.94-1.61)	1.36 (0.97-1.95)	1.15 (0.94-1.52)
	Min - Max	0.61-2.38	0.74-2.38	0.61-1.74
	N missing	2	1	1
	Post Sx - folder change from Baseline				0.624*
	Total N	9	4	5
	Mean (Std Dev)	1.55 (0.73)	1.46 (0.96)	1.62 (0.61)
	Median (Q1-Q3)	1.5 (1.04-2.04)	1.05 (0.94-1.98)	1.86 (1.5-2.04)
	Min - Max	0.62-2.89	0.85-2.89	0.62-2.1
	N missing	5	1	4
MCP-1	Mean Baseline				0.758*
	Total N	13	4	9
	Mean (Std Dev)	44.91 (14.68)	44.1 (20.33)	45.27 (12.96)
	Median (Q1-Q3)	43.39 (36.09-47.28)	46.52 (31.62-56.59)	42.21 (36.09-47.28)
	Min - Max	17.03-70.11	17.03-66.35	29.92-70.11
	W6D1 - folder change from Baseline				0.683*
	Total N	11	3	8
	Mean (Std Dev)	1.41 (0.3)	1.44 (0.47)	1.4 (0.25)
	Median (Q1-Q3)	1.4 (1.19-1.66)	1.44 (0.97-1.91)	1.38 (1.23-1.54)
	Min - Max	0.97-1.91	0.97-1.91	1.06-1.84
	N missing	2	1	1
	Post Tx - folder change from Baseline				1*
	Total N	11	3	8
	Mean (Std Dev)	1.6 (0.69)	1.69 (0.97)	1.56 (0.65)
	Median (Q1-Q3)	1.34 (1.13-2.05)	1.39 (0.92-2.77)	1.25 (1.13-1.9)
	Min - Max	0.92-2.9	0.92-2.77	1.05-2.9
	N missing	2	1	1
	Post Sx - folder change from Baseline				0.655*
	Total N	8	3	5
	Mean (Std Dev)	1.07 (0.46)	0.98 (0.57)	1.12 (0.44)
	Median (Q1-Q3)	1.06 (0.67-1.49)	0.87 (0.48-1.6)	1.24 (0.83-1.39)
	Min - Max	0.48-1.62	0.48-1.6	0.52-1.62
	N missing	5	1	4
MCP-2	Mean Baseline				0.096*
	Total N	14	5	9
	Mean (Std Dev)	16.52 (2.61)	17.86 (2.33)	15.78 (2.57)
	Median (Q1-Q3)	16.76 (14.85-17.99)	17.99 (16.87-18.2)	16.43 (14.1-17.75)
	Min - Max	12.07-21.32	14.92-21.32	12.07-19.77
	W6D1 - folder change from Baseline				0.062*
	Total N	12	4	8
	Mean (Std Dev)	1.19 (0.2)	1.28 (0.23)	1.15 (0.18)
	Median (Q1-Q3)	1.15 (1.1-1.19)	1.18 (1.16-1.41)	1.13 (1.06-1.16)
	Min - Max	0.94-1.62	1.15-1.62	0.94-1.55
	N missing	2	1	1
	Post Tx - folder change from Baseline				0.042*
	Total N	12	4	8
	Mean (Std Dev)	1.17 (0.31)	1.47 (0.39)	1.02 (0.08)
	Median (Q1-Q3)	1.03 (0.97-1.3)	1.46 (1.22-1.72)	1 (0.96-1.08)
	Min - Max	0.95-1.96	1-1.96	0.95-1.17
	N missing	2	1	1
	Post Sx - folder change from Baseline				0.624*
	Total N	9	4	5
	Mean (Std Dev)	1.2 (0.25)	1.21 (0.2)	1.2 (0.31)
	Median (Q1-Q3)	1.28 (1.17-1.34)	1.23 (1.06-1.36)	1.3 (1.21-1.34)
	Min - Max	0.67-1.47	0.95-1.44	0.67-1.47
	N missing	5	1	4
MIG	Mean Baseline				0.003*
	Total N	14	5	9
	Mean (Std Dev)	27.84 (20.73)	10.81 (1.78)	37.3 (20.37)
	Median (Q1-Q3)	19.93 (11.92-38.61)	10.02 (9.87-11.92)	32.63 (20.88-44.1)
	Min - Max	8.92-69.74	8.92-13.33	13.48-69.74
	W6D1 - folder change from Baseline				0.396*
	Total N	12	4	8
	Mean (Std Dev)	1.85 (1.53)	2.96 (2.35)	1.29 (0.49)
	Median (Q1-Q3)	1.34 (1-1.86)	2.53 (1.04-4.88)	1.34 (0.94-1.68)
	Min - Max	0.48-5.84	0.94-5.84	0.48-1.91
	N missing	2	1	1
	Post Tx - folder change from Baseline				0.308*
	Total N	12	4	8
	Mean (Std Dev)	1.23 (0.94)	1.83 (1.48)	0.93 (0.37)
	Median (Q1-Q3)	0.82 (0.65-1.4)	1.46 (0.66-2.99)	0.82 (0.6-1.23)
	Min - Max	0.55-3.74	0.65-3.74	0.55-1.57
	N missing	2	1	1
	Post Sx - folder change from Baseline				0.624*
	Total N	9	4	5
	Mean (Std Dev)	1.83 (1.11)	2.05 (1.56)	1.66 (0.73)
	Median (Q1-Q3)	1.72 (1.3-1.86)	1.35 (1.2-2.89)	1.8 (1.72-1.86)
	Min - Max	0.46-4.39	1.1-4.39	0.46-2.44
	N missing	5	1	4
MIP-1a	Mean Baseline				0.096*
	Total N	14	5	9
	Mean (Std Dev)	3.32 (0.99)	2.7 (0.58)	3.66 (1.03)
	Median (Q1-Q3)	3.12 (2.48-4.41)	2.83 (2.26-2.89)	3.35 (2.95-4.61)
	Min - Max	2.02-4.9	2.02-3.49	2.22-4.9
	W6D1 - folder change from Baseline				1*
	Total N	12	4	8
	Mean (Std Dev)	1.07 (0.27)	1.1 (0.38)	1.06 (0.23)
	Median (Q1-Q3)	1.02 (0.85-1.2)	0.95 (0.85-1.35)	1.03 (0.87-1.2)
	Min - Max	0.79-1.66	0.82-1.66	0.79-1.48
	N missing	2	1	1
	Post Tx - folder change from Baseline				0.126*
	Total N	12	4	8
	Mean (Std Dev)	1.01 (0.36)	1.35 (0.47)	0.84 (0.11)
	Median (Q1-Q3)	0.91 (0.75-1.19)	1.47 (1.04-1.67)	0.86 (0.75-0.93)
	Min - Max	0.67-1.8	0.69-1.8	0.67-0.99
	N missing	2	1	1
	Post Sx - folder change from Baseline				0.624*
	Total N	9	4	5
	Mean (Std Dev)	1.35 (0.41)	1.27 (0.32)	1.42 (0.5)
	Median (Q1-Q3)	1.19 (1.07-1.74)	1.16 (1.09-1.46)	1.67 (1.07-1.79)
	Min - Max	0.71-1.85	1.03-1.74	0.71-1.85
	N missing	5	1	4
Rantes	Mean Baseline				0.257*
	Total N	14	5	9
	Mean (Std Dev)	3010.51 (2255.21)	3962.68 (2608.87)	2481.52 (1995.04)
	Median (Q1-Q3)	1940.85 (1296.83-5602.52)	4201.22 (1393.63-5602.52)	1578.5 (1218.09-2341.63)
	Min - Max	648.51-7277.9	1338.17-7277.9	648.51-5948.66
	W6D1 - folder change from Baseline				0.497*
	Total N	12	4	8
	Mean (Std Dev)	3.72 (6.14)	3.9 (4.6)	3.63 (7.09)
	Median (Q1-Q3)	1.34 (0.86-2.26)	2.24 (1.12-6.68)	1.04 (0.86-1.68)
	Min - Max	0.46-21.14	0.46-10.66	0.75-21.14
	N missing	2	1	1
	Post Tx - folder change from Baseline				0.126*
	Total N	12	4	8
	Mean (Std Dev)	2.18 (2.14)	3.56 (3.41)	1.49 (0.77)
	Median (Q1-Q3)	1.47 (1.01-2.62)	2.36 (1.3-5.82)	1.35 (0.9-2.08)
	Min - Max	0.6-8.49	1.01-8.49	0.6-2.65
	N missing	2	1	1
	Post Sx - folder change from Baseline				0.806*
	Total N	9	4	5
	Mean (Std Dev)	2.1 (3.36)	1.52 (1.53)	2.57 (4.5)
	Median (Q1-Q3)	0.66 (0.29-2.33)	1.31 (0.23-2.8)	0.66 (0.47-0.85)
	Min - Max	0.17-10.61	0.17-3.27	0.25-10.61
	N missing	5	1	4
S100A8	Mean Baseline				0.802*
	Total N	14	5	9
	Mean (Std Dev)	66.65 (151.69)	125.53 (254.31)	33.94 (41.01)
	Median (Q1-Q3)	11.8 (11.8-28.68)	11.8 (11.8-11.8)	11.8 (11.8-28.68)
	Min - Max	11.8-580.45	11.8-580.45	11.8-124.8
	W6D1 - folder change from Baseline				0.705*
	Total N	12	4	8
	Mean (Std Dev)	1.42 (1.71)	1.02 (0.04)	1.62 (2.11)
	Median (Q1-Q3)	1 (1-1.04)	1 (1-1.04)	1 (0.85-1.18)
	Min - Max	0.15-6.77	1-1.08	0.15-6.77
	N missing	2	1	1
	Post Tx - folder change from Baseline				0.037*
	Total N	12	4	8
	Mean (Std Dev)	3.69 (7.23)	8.97 (11.6)	1.05 (0.7)
	Median (Q1-Q3)	1 (1-1.9)	4.61 (1.08-16.86)	1 (0.71-1)
	Min - Max	0.35-25.66	1-25.66	0.35-2.65
	N missing	2	1	1
	Post Sx - folder change from Baseline				0.609*
	Total N	9	4	5
	Mean (Std Dev)	1.83 (1.65)	2.15 (2.23)	1.57 (1.22)
	Median (Q1-Q3)	1 (1-2.34)	1.04 (1-3.29)	1 (1-2.34)
	Min - Max	0.24-5.49	1-5.49	0.24-3.29
	N missing	5	1	4
Tie-2	Mean Baseline				0.463*
	Total N	14	5	9
	Mean (Std Dev)	11237.48 (6769.23)	9458.94 (6080.66)	12225.56 (7273.16)
	Median (Q1-Q3)	8910.4 (7325.67-14704.69)	7624.08 (5060.74-14704.69)	9381.27 (8000.86-13511.46)
	Min - Max	2981.89-29852.74	2981.89-16923.3	5942.05-29852.74
	W6D1 - folder change from Baseline				0.865*
	Total N	12	4	8
	Mean (Std Dev)	0.85 (0.16)	0.83 (0.13)	0.86 (0.18)
	Median (Q1-Q3)	0.83 (0.71-0.94)	0.83 (0.71-0.94)	0.83 (0.72-0.92)
	Min - Max	0.68-1.24	0.7-0.95	0.68-1.24
	N missing	2	1	1
	Post Tx - folder change from Baseline				0.308*
	Total N	12	4	8
	Mean (Std Dev)	0.8 (0.27)	0.93 (0.34)	0.74 (0.22)
	Median (Q1-Q3)	0.79 (0.58-0.92)	0.88 (0.68-1.18)	0.74 (0.54-0.83)
	Min - Max	0.51-1.37	0.6-1.37	0.51-1.16
	N missing	2	1	1
	Post Sx - folder change from Baseline				0.327*
	Total N	9	4	5
	Mean (Std Dev)	1.09 (0.25)	1.19 (0.27)	1.01 (0.23)
	Median (Q1-Q3)	1.02 (0.89-1.34)	1.28 (1-1.37)	0.99 (0.89-1.02)
	Min - Max	0.78-1.4	0.8-1.4	0.78-1.38
	N missing	5	1	4
VEGF	Mean Baseline				0.463*
	Total N	14	5	9
	Mean (Std Dev)	13.8 (14.61)	7.78 (3.33)	17.14 (17.49)
	Median (Q1-Q3)	9.77 (4.74-12.29)	9.64 (4.74-9.91)	10.65 (5.63-24.03)
	Min - Max	2.92-53.92	3.67-10.98	2.92-53.92
	W6D1 - folder change from Baseline				0.027*
	Total N	12	4	8
	Mean (Std Dev)	5.82 (4.86)	10.24 (6.29)	3.61 (1.83)
	Median (Q1-Q3)	4.66 (2.42-6.09)	10 (4.82-15.67)	2.78 (2.24-4.75)
	Min - Max	2.06-16.29	4.69-16.29	2.06-7.24
	N missing	2	1	1
	Post Tx - folder change from Baseline				0.234*
	Total N	12	4	8
	Mean (Std Dev)	2.65 (1.66)	3.7 (2.29)	2.12 (1.06)
	Median (Q1-Q3)	2.36 (1.48-3.37)	2.92 (2.12-5.28)	2.11 (1.12-2.81)
	Min - Max	1.01-6.97	1.98-6.97	1.01-3.89
	N missing	2	1	1
	Post Sx - folder change from Baseline				1*
	Total N	9	4	5
	Mean (Std Dev)	0.79 (0.49)	0.84 (0.51)	0.76 (0.54)
	Median (Q1-Q3)	0.77 (0.32-1.07)	0.75 (0.52-1.15)	0.93 (0.32-1.07)
	Min - Max	0.08-1.53	0.31-1.53	0.08-1.38
	N missing	5	1	4
VEGF-C	Mean Baseline				0.463*
	Total N	14	5	9
	Mean (Std Dev)	179.79 (134.39)	214.16 (121.89)	160.7 (144.13)
	Median (Q1-Q3)	167.78 (44.93-299.11)	285.7 (127.8-299.11)	121.22 (44.93-249.67)
	Min - Max	11-409.69	42.76-315.44	11-409.69
	W6D1 - folder change from Baseline				0.308*
	Total N	12	4	8
	Mean (Std Dev)	1.05 (0.46)	1.21 (0.4)	0.98 (0.5)
	Median (Q1-Q3)	1.05 (0.65-1.37)	1.27 (0.89-1.53)	1.02 (0.5-1.26)
	Min - Max	0.39-1.85	0.72-1.6	0.39-1.85
	N missing	2	1	1
	Post Tx - folder change from Baseline				0.396*
	Total N	12	4	8
	Mean (Std Dev)	1.28 (0.7)	1.57 (0.96)	1.13 (0.55)
	Median (Q1-Q3)	1.12 (0.82-1.48)	1.28 (0.98-2.15)	1.02 (0.79-1.45)
	Min - Max	0.38-2.95	0.76-2.95	0.38-2.16
	N missing	2	1	1
	Post Sx - folder change from Baseline				1*
	Total N	9	4	5
	Mean (Std Dev)	1.77 (2.37)	1.06 (0.61)	2.34 (3.17)
	Median (Q1-Q3)	1 (0.74-1.65)	0.98 (0.62-1.5)	1 (0.74-1.65)
	Min - Max	0.36-7.94	0.41-1.86	0.36-7.94
	N missing	5	1	4
VEGF-R2	Mean Baseline				0.053*
	Total N	14	5	9
	Mean (Std Dev)	8743.78 (2067.93)	10200.16 (2188.35)	7934.68 (1578.76)
	Median (Q1-Q3)	8481.06 (7157.08-9402.39)	8877.56 (8704.64-12403.21)	7301.98 (6960.28-8742.99)
	Min - Max	6279.99-12757.93	8257.48-12757.93	6279.99-11168.51
	W6D1 - folder change from Baseline				0.062*
	Total N	12	4	8
	Mean (Std Dev)	0.68 (0.18)	0.55 (0.07)	0.74 (0.18)
	Median (Q1-Q3)	0.66 (0.54-0.76)	0.54 (0.51-0.6)	0.71 (0.64-0.86)
	Min - Max	0.45-1.03	0.49-0.66	0.45-1.03
	N missing	2	1	1
	Post Tx - folder change from Baseline				0.61*
	Total N	12	4	8
	Mean (Std Dev)	0.59 (0.12)	0.58 (0.03)	0.59 (0.15)
	Median (Q1-Q3)	0.58 (0.56-0.63)	0.58 (0.57-0.6)	0.58 (0.52-0.65)
	Min - Max	0.33-0.85	0.56-0.62	0.33-0.85
	N missing	2	1	1
	Post Sx - folder change from Baseline				0.624*
	Total N	9	4	5
	Mean (Std Dev)	1.13 (0.21)	1.15 (0.34)	1.11 (0.07)
	Median (Q1-Q3)	1.1 (1.01-1.17)	1.05 (0.92-1.39)	1.1 (1.08-1.17)
	Min - Max	0.89-1.63	0.89-1.63	1.01-1.19
	N missing	5	1	4
c-MET	Mean Baseline				0.386*
	Total N	14	5	9
	Mean (Std Dev)	172186.05 (47680.5)	158867 (44376.48)	179585.52 (50370.82)
	Median (Q1-Q3)	160491.25 (133394-216820.2)	152904.5 (127046.8-173472.46)	163108.5 (140021.8-216820.2)
	Min - Max	114121.35-262173.2	114121.35-226789.9	129651.3-262173.2
	W6D1 - folder change from Baseline				0.042*
	Total N	12	4	8
	Mean (Std Dev)	1.18 (0.21)	1.03 (0.12)	1.26 (0.2)
	Median (Q1-Q3)	1.16 (1.05-1.24)	1.05 (0.95-1.1)	1.22 (1.12-1.38)
	Min - Max	0.87-1.6	0.87-1.14	1.03-1.6
	N missing	2	1	1
	Post Tx - folder change from Baseline				0.234*
	Total N	12	4	8
	Mean (Std Dev)	1.09 (0.18)	1 (0.18)	1.13 (0.17)
	Median (Q1-Q3)	1.08 (0.95-1.22)	0.96 (0.88-1.13)	1.1 (1.03-1.22)
	Min - Max	0.85-1.43	0.85-1.25	0.87-1.43
	N missing	2	1	1
	Post Sx - folder change from Baseline				1*
	Total N	9	4	5
	Mean (Std Dev)	1.1 (0.1)	1.09 (0.09)	1.1 (0.12)
	Median (Q1-Q3)	1.08 (1.03-1.15)	1.08 (1.03-1.15)	1.06 (1.03-1.15)
	Min - Max	0.99-1.29	0.99-1.2	0.99-1.29
	N missing	5	1	4
** The p-value is calculated by ANOVA test (parametric) or Kruskal-Wallis test (non-parametric) for numerical covariates, where appropriate.
* Non-parametric test: Kruskal-Wallis test is applied.

## Sheet: Supplementary Table 3
Supplementary Table 3. Summary of Cytokines with Tumor Shrink 20
			Tumor Shrink >=20%
Biomarkers	Covariate	Total N= 308 (100%)	Yes N=220 (71.43%)	No N=88 (28.57%)	P-value**
AFP	Mean Baseline				0.777*
	Total N	14	10	4
	Mean (Std Dev)	647.28 (217.18)	641.24 (187.78)	662.37 (313.33)
	Median (Q1-Q3)	596.04 (512.12-868.6)	577.22 (512.12-868.6)	628.51 (444.19-880.55)
	Min - Max	320.32-1072.15	405.57-910.69	320.32-1072.15
	W6D1 - folder change from Baseline				0.932*
	Total N	12	8	4
	Mean (Std Dev)	0.72 (0.28)	0.72 (0.28)	0.72 (0.33)
	Median (Q1-Q3)	0.69 (0.47-0.97)	0.67 (0.47-0.94)	0.81 (0.47-0.97)
	Min - Max	0.27-1.19	0.41-1.19	0.27-1
	N missing	2	2	0
	Post Tx - folder change from Baseline				0.61*
	Total N	12	8	4
	Mean (Std Dev)	0.87 (0.4)	0.93 (0.47)	0.76 (0.2)
	Median (Q1-Q3)	0.88 (0.56-1.01)	0.91 (0.52-1.19)	0.76 (0.6-0.93)
	Min - Max	0.4-1.79	0.4-1.79	0.54-1
	N missing	2	2	0
	Post Sx - folder change from Baseline				0.302*
	Total N	9	6	3
	Mean (Std Dev)	0.88 (0.3)	0.87 (0.37)	0.9 (0.12)
	Median (Q1-Q3)	0.81 (0.76-0.9)	0.78 (0.74-0.9)	0.86 (0.81-1.03)
	Min - Max	0.46-1.57	0.46-1.57	0.81-1.03
	N missing	5	4	1
AXL	Mean Baseline				1*
	Total N	14	10	4
	Mean (Std Dev)	1009.55 (447.41)	980.21 (373.79)	1082.9 (661.97)
	Median (Q1-Q3)	999.09 (664.14-1229.96)	999.09 (664.14-1229.96)	1005.39 (664.5-1501.31)
	Min - Max	357.85-1962.99	467.27-1590.65	357.85-1962.99
	W6D1 - folder change from Baseline				0.308*
	Total N	12	8	4
	Mean (Std Dev)	1.75 (0.81)	1.95 (0.88)	1.34 (0.52)
	Median (Q1-Q3)	1.67 (1.33-1.95)	1.75 (1.36-2.15)	1.48 (0.98-1.71)
	Min - Max	0.61-3.94	1.14-3.94	0.61-1.8
	N missing	2	2	0
	Post Tx - folder change from Baseline				1*
	Total N	12	8	4
	Mean (Std Dev)	1.82 (0.91)	1.82 (0.9)	1.83 (1.06)
	Median (Q1-Q3)	1.37 (1.35-2.42)	1.37 (1.35-1.97)	1.88 (0.97-2.69)
	Min - Max	0.58-3.85	1.28-3.85	0.58-2.96
	N missing	2	2	0
	Post Sx - folder change from Baseline				0.606*
	Total N	9	6	3
	Mean (Std Dev)	1.31 (0.44)	1.39 (0.38)	1.13 (0.6)
	Median (Q1-Q3)	1.3 (1.09-1.6)	1.34 (1.09-1.6)	1.12 (0.54-1.74)
	Min - Max	0.54-2.01	0.96-2.01	0.54-1.74
	N missing	5	4	1
Angiopoietin-1	Mean Baseline				0.572*
	Total N	14	10	4
	Mean (Std Dev)	1592.47 (1364.21)	1579.7 (1554.63)	1624.4 (901.13)
	Median (Q1-Q3)	1141.81 (720.65-2151.07)	939.58 (720.65-1624.61)	1931.44 (1019.29-2229.51)
	Min - Max	326.77-5543.7	481.9-5543.7	326.77-2307.95
	W6D1 - folder change from Baseline				0.234*
	Total N	12	8	4
	Mean (Std Dev)	2.15 (2)	2.57 (2.3)	1.3 (0.9)
	Median (Q1-Q3)	1.89 (1.08-2.35)	2.12 (1.45-2.35)	1.08 (0.74-1.86)
	Min - Max	0.47-8.06	0.64-8.06	0.47-2.57
	N missing	2	2	0
	Post Tx - folder change from Baseline				0.234*
	Total N	12	8	4
	Mean (Std Dev)	1.86 (1.44)	2.22 (1.58)	1.15 (0.87)
	Median (Q1-Q3)	1.25 (0.85-2.37)	1.76 (0.95-3.4)	0.84 (0.57-1.74)
	Min - Max	0.53-4.78	0.76-4.78	0.53-2.4
	N missing	2	2	0
	Post Sx - folder change from Baseline				0.796*
	Total N	9	6	3
	Mean (Std Dev)	2.36 (4.97)	0.85 (0.79)	5.39 (8.75)
	Median (Q1-Q3)	0.47 (0.25-1.84)	0.47 (0.25-1.84)	0.47 (0.21-15.49)
	Min - Max	0.2-15.49	0.2-1.88	0.21-15.49
	N missing	5	4	1
Angiopoietin-2	Mean Baseline				0.203*
	Total N	14	10	4
	Mean (Std Dev)	2824.88 (2346.01)	2119.41 (1303.09)	4588.54 (3598.51)
	Median (Q1-Q3)	1741.56 (1510.07-3518.99)	1622.76 (1510.07-2671.54)	3771.58 (1904.96-7272.12)
	Min - Max	693.39-9446.63	693.39-5068.47	1364.37-9446.63
	W6D1 - folder change from Baseline				0.062*
	Total N	12	8	4
	Mean (Std Dev)	0.76 (0.32)	0.89 (0.27)	0.5 (0.28)
	Median (Q1-Q3)	0.79 (0.54-0.89)	0.81 (0.77-0.92)	0.42 (0.3-0.7)
	Min - Max	0.27-1.49	0.57-1.49	0.27-0.89
	N missing	2	2	0
	Post Tx - folder change from Baseline				0.089*
	Total N	12	8	4
	Mean (Std Dev)	0.61 (0.28)	0.7 (0.26)	0.42 (0.24)
	Median (Q1-Q3)	0.65 (0.37-0.75)	0.7 (0.57-0.79)	0.36 (0.24-0.59)
	Min - Max	0.2-1.2	0.3-1.2	0.2-0.75
	N missing	2	2	0
	Post Sx - folder change from Baseline				0.302*
	Total N	9	6	3
	Mean (Std Dev)	1.04 (0.32)	1.1 (0.35)	0.91 (0.26)
	Median (Q1-Q3)	1.03 (0.77-1.22)	1.12 (0.77-1.44)	0.93 (0.64-1.17)
	Min - Max	0.64-1.51	0.65-1.51	0.64-1.17
	N missing	5	4	1
CEA	Mean Baseline				0.007*
	Total N	14	10	4
	Mean (Std Dev)	596.06 (807.92)	789.11 (892.62)	113.43 (58.03)
	Median (Q1-Q3)	256.98 (161.34-659.15)	392.45 (243.18-672.47)	122.11 (74.36-152.5)
	Min - Max	35.29-2475.76	161.34-2475.76	35.29-174.21
	W6D1 - folder change from Baseline				0.61*
	Total N	12	8	4
	Mean (Std Dev)	1.12 (0.62)	1.12 (0.65)	1.13 (0.65)
	Median (Q1-Q3)	1.02 (0.8-1.39)	0.98 (0.8-1.26)	1.22 (0.65-1.6)
	Min - Max	0.27-2.55	0.35-2.55	0.27-1.8
	N missing	2	2	0
	Post Tx - folder change from Baseline				0.497*
	Total N	12	8	4
	Mean (Std Dev)	1.59 (1.22)	1.28 (0.45)	2.2 (2.06)
	Median (Q1-Q3)	1.28 (1.06-1.77)	1.22 (1.06-1.57)	1.61 (0.87-3.52)
	Min - Max	0.42-5.14	0.55-2.03	0.42-5.14
	N missing	2	2	0
	Post Sx - folder change from Baseline				0.197*
	Total N	9	6	3
	Mean (Std Dev)	1.19 (0.71)	0.93 (0.25)	1.72 (1.1)
	Median (Q1-Q3)	0.94 (0.75-1.27)	0.84 (0.74-1.11)	1.27 (0.91-2.97)
	Min - Max	0.69-2.97	0.69-1.33	0.91-2.97
	N missing	5	4	1
Eotaxin-3	Mean Baseline				0.777*
	Total N	14	10	4
	Mean (Std Dev)	6.21 (1.93)	6.11 (2.13)	6.45 (1.58)
	Median (Q1-Q3)	6.26 (4.96-7.29)	5.92 (4.96-7.29)	6.68 (5.3-7.6)
	Min - Max	3.3-9.8	3.3-9.8	4.37-8.07
	W6D1 - folder change from Baseline				0.734*
	Total N	12	8	4
	Mean (Std Dev)	1.24 (0.22)	1.21 (0.26)	1.28 (0.1)
	Median (Q1-Q3)	1.23 (1.14-1.4)	1.17 (1.12-1.45)	1.3 (1.22-1.35)
	Min - Max	0.71-1.52	0.71-1.52	1.15-1.38
	N missing	2	2	0
	Post Tx - folder change from Baseline				0.234*
	Total N	12	8	4
	Mean (Std Dev)	0.98 (0.15)	1 (0.17)	0.92 (0.08)
	Median (Q1-Q3)	0.98 (0.86-1.08)	1.05 (0.87-1.1)	0.95 (0.86-0.98)
	Min - Max	0.74-1.23	0.74-1.23	0.8-0.98
	N missing	2	2	0
	Post Sx - folder change from Baseline				0.606*
	Total N	9	6	3
	Mean (Std Dev)	0.84 (0.19)	0.86 (0.16)	0.81 (0.28)
	Median (Q1-Q3)	0.82 (0.68-1)	0.88 (0.74-1)	0.68 (0.61-1.13)
	Min - Max	0.61-1.13	0.62-1.04	0.61-1.13
	N missing	5	4	1
GAS6	Mean Baseline				0.12*
	Total N	14	10	4
	Mean (Std Dev)	6638.06 (2504.84)	5975.82 (1840.36)	8293.65 (3451.22)
	Median (Q1-Q3)	6259.67 (4718.98-7067.1)	5497.4 (4547.72-6971.89)	7766.89 (5893.04-10694.26)
	Min - Max	3867.19-12921.84	3867.19-10147.31	4718.98-12921.84
	W6D1 - folder change from Baseline				0.61*
	Total N	12	8	4
	Mean (Std Dev)	1.78 (0.67)	1.86 (0.77)	1.61 (0.46)
	Median (Q1-Q3)	1.7 (1.22-2.22)	1.86 (1.22-2.33)	1.7 (1.28-1.94)
	Min - Max	0.89-3.16	0.89-3.16	0.99-2.05
	N missing	2	2	0
	Post Tx - folder change from Baseline				0.865*
	Total N	12	8	4
	Mean (Std Dev)	1.36 (0.54)	1.32 (0.53)	1.45 (0.65)
	Median (Q1-Q3)	1.18 (0.98-1.6)	1.17 (0.98-1.42)	1.37 (0.97-1.94)
	Min - Max	0.77-2.49	0.89-2.49	0.77-2.3
	N missing	2	2	0
	Post Sx - folder change from Baseline				0.796*
	Total N	9	6	3
	Mean (Std Dev)	0.69 (0.19)	0.71 (0.21)	0.66 (0.17)
	Median (Q1-Q3)	0.68 (0.58-0.81)	0.71 (0.58-0.91)	0.68 (0.48-0.81)
	Min - Max	0.4-0.95	0.4-0.95	0.48-0.81
	N missing	5	4	1
HGF	Mean Baseline				0.396*
	Total N	14	10	4
	Mean (Std Dev)	71.42 (34.91)	67.55 (27.71)	81.12 (52.94)
	Median (Q1-Q3)	64.74 (44.19-101.76)	58.36 (44.19-92.77)	97.95 (42.75-119.48)
	Min - Max	7.29-121.27	43.94-119.85	7.29-121.27
	W6D1 - folder change from Baseline				0.027*
	Total N	12	8	4
	Mean (Std Dev)	1.07 (0.44)	1.22 (0.46)	0.77 (0.18)
	Median (Q1-Q3)	0.99 (0.81-1.21)	1.16 (0.99-1.26)	0.81 (0.66-0.88)
	Min - Max	0.52-2.25	0.7-2.25	0.52-0.94
	N missing	2	2	0
	Post Tx - folder change from Baseline				0.027*
	Total N	12	8	4
	Mean (Std Dev)	13.3 (33.09)	19.65 (39.79)	0.62 (0.17)
	Median (Q1-Q3)	0.98 (0.55-1.17)	1.02 (0.98-20.07)	0.55 (0.51-0.72)
	Min - Max	0.5-112.5	0.52-112.5	0.5-0.87
	N missing	2	2	0
	Post Sx - folder change from Baseline				0.606*
	Total N	9	6	3
	Mean (Std Dev)	0.88 (0.32)	0.93 (0.27)	0.76 (0.46)
	Median (Q1-Q3)	0.88 (0.8-1.03)	0.93 (0.8-1.03)	0.88 (0.25-1.15)
	Min - Max	0.25-1.36	0.55-1.36	0.25-1.15
	N missing	5	4	1
I-TAC	Mean Baseline				0.016*
	Total N	14	10	4
	Mean (Std Dev)	7.81 (3.81)	6.09 (2.43)	12.1 (3.28)
	Median (Q1-Q3)	6.93 (6.07-10.21)	6.4 (5.99-7.4)	13.27 (10.19-14.02)
	Min - Max	1.31-14.6	1.31-10.21	7.29-14.6
	W6D1 - folder change from Baseline				0.089*
	Total N	12	8	4
	Mean (Std Dev)	2.13 (1.03)	2.44 (1.13)	1.53 (0.41)
	Median (Q1-Q3)	1.96 (1.41-2.53)	2.21 (1.72-2.99)	1.56 (1.19-1.86)
	Min - Max	0.99-4.65	0.99-4.65	1.03-1.95
	N missing	2	2	0
	Post Tx - folder change from Baseline				0.61*
	Total N	12	8	4
	Mean (Std Dev)	1.45 (0.72)	1.53 (0.74)	1.3 (0.76)
	Median (Q1-Q3)	1.24 (1.02-1.71)	1.24 (1.12-1.69)	1.18 (0.72-1.87)
	Min - Max	0.54-3.21	0.97-3.21	0.54-2.28
	N missing	2	2	0
	Post Sx - folder change from Baseline				0.439*
	Total N	9	6	3
	Mean (Std Dev)	0.98 (0.42)	1.06 (0.44)	0.83 (0.4)
	Median (Q1-Q3)	0.9 (0.75-1.27)	1.01 (0.78-1.42)	0.75 (0.48-1.27)
	Min - Max	0.44-1.66	0.44-1.66	0.48-1.27
	N missing	5	4	1
IGF-I	Mean Baseline				0.48*
	Total N	14	10	4
	Mean (Std Dev)	59945.01 (16692.24)	57109.97 (16183.3)	67032.64 (18108.9)
	Median (Q1-Q3)	59386.73 (50785.7-64716.15)	55978.33 (50147-64716.15)	62266.15 (55419.6-78645.68)
	Min - Max	27380.45-92812.55	27380.45-86499.65	50785.7-92812.55
	W6D1 - folder change from Baseline				0.61*
	Total N	12	8	4
	Mean (Std Dev)	0.81 (0.16)	0.82 (0.19)	0.79 (0.1)
	Median (Q1-Q3)	0.86 (0.64-0.9)	0.89 (0.62-0.94)	0.81 (0.71-0.86)
	Min - Max	0.57-1.08	0.57-1.08	0.64-0.88
	N missing	2	2	0
	Post Tx - folder change from Baseline				0.497*
	Total N	12	8	4
	Mean (Std Dev)	0.73 (0.16)	0.73 (0.19)	0.75 (0.1)
	Median (Q1-Q3)	0.77 (0.61-0.8)	0.72 (0.57-0.88)	0.8 (0.7-0.8)
	Min - Max	0.47-1	0.47-1	0.61-0.81
	N missing	2	2	0
	Post Sx - folder change from Baseline				0.606*
	Total N	9	6	3
	Mean (Std Dev)	1.25 (0.37)	1.26 (0.42)	1.22 (0.31)
	Median (Q1-Q3)	1.26 (0.95-1.54)	1.35 (0.95-1.54)	1.17 (0.93-1.54)
	Min - Max	0.61-1.77	0.61-1.77	0.93-1.54
	N missing	5	4	1
IP-10	Mean Baseline				0.888*
	Total N	14	10	4
	Mean (Std Dev)	81.88 (36.9)	82.89 (42.26)	79.35 (23.02)
	Median (Q1-Q3)	77.47 (50.91-113.78)	76.73 (40.83-114.58)	81.58 (59.86-98.84)
	Min - Max	35.41-149.3	35.41-149.3	54.08-100.16
	W6D1 - folder change from Baseline				1*
	Total N	12	8	4
	Mean (Std Dev)	1.93 (1.2)	2.11 (1.45)	1.57 (0.37)
	Median (Q1-Q3)	1.55 (1.16-2.42)	1.55 (1.11-3.42)	1.55 (1.26-1.88)
	Min - Max	0.38-4.36	0.38-4.36	1.2-1.98
	N missing	2	2	0
	Post Tx - folder change from Baseline				0.234*
	Total N	12	8	4
	Mean (Std Dev)	1.28 (0.5)	1.21 (0.56)	1.43 (0.37)
	Median (Q1-Q3)	1.22 (0.94-1.61)	1.13 (0.83-1.38)	1.52 (1.15-1.72)
	Min - Max	0.61-2.38	0.61-2.38	0.95-1.74
	N missing	2	2	0
	Post Sx - folder change from Baseline				0.606*
	Total N	9	6	3
	Mean (Std Dev)	1.55 (0.73)	1.63 (0.79)	1.39 (0.72)
	Median (Q1-Q3)	1.5 (1.04-2.04)	1.47 (1.04-2.1)	1.5 (0.62-2.04)
	Min - Max	0.62-2.89	0.85-2.89	0.62-2.04
	N missing	5	4	1
MCP-1	Mean Baseline				0.758*
	Total N	13	9	4
	Mean (Std Dev)	44.91 (14.68)	43.56 (15.2)	47.95 (15.11)
	Median (Q1-Q3)	43.39 (36.09-47.28)	46.21 (35.93-47.28)	42.8 (39.15-56.75)
	Min - Max	17.03-70.11	17.03-66.35	36.09-70.11
	W6D1 - folder change from Baseline				0.345*
	Total N	11	7	4
	Mean (Std Dev)	1.41 (0.3)	1.45 (0.29)	1.34 (0.35)
	Median (Q1-Q3)	1.4 (1.19-1.66)	1.41 (1.36-1.66)	1.23 (1.12-1.56)
	Min - Max	0.97-1.91	0.97-1.91	1.06-1.84
	N missing	2	2	0
	Post Tx - folder change from Baseline				0.45*
	Total N	11	7	4
	Mean (Std Dev)	1.6 (0.69)	1.77 (0.81)	1.29 (0.31)
	Median (Q1-Q3)	1.34 (1.13-2.05)	1.39 (1.05-2.77)	1.15 (1.13-1.46)
	Min - Max	0.92-2.9	0.92-2.9	1.13-1.76
	N missing	2	2	0
	Post Sx - folder change from Baseline				0.881*
	Total N	8	5	3
	Mean (Std Dev)	1.07 (0.46)	1.08 (0.51)	1.05 (0.47)
	Median (Q1-Q3)	1.06 (0.67-1.49)	0.87 (0.83-1.6)	1.24 (0.52-1.39)
	Min - Max	0.48-1.62	0.48-1.62	0.52-1.39
	N missing	5	4	1
MCP-2	Mean Baseline				0.258*
	Total N	14	10	4
	Mean (Std Dev)	16.52 (2.61)	16.99 (2.62)	15.34 (2.5)
	Median (Q1-Q3)	16.76 (14.85-17.99)	17.31 (14.92-18.2)	15.75 (13.46-17.23)
	Min - Max	12.07-21.32	12.59-21.32	12.07-17.81
	W6D1 - folder change from Baseline				0.865*
	Total N	12	8	4
	Mean (Std Dev)	1.19 (0.2)	1.19 (0.18)	1.2 (0.26)
	Median (Q1-Q3)	1.15 (1.1-1.19)	1.15 (1.1-1.18)	1.15 (1.03-1.37)
	Min - Max	0.94-1.62	1.04-1.62	0.94-1.55
	N missing	2	2	0
	Post Tx - folder change from Baseline				0.396*
	Total N	12	8	4
	Mean (Std Dev)	1.17 (0.31)	1.24 (0.36)	1.05 (0.11)
	Median (Q1-Q3)	1.03 (0.97-1.3)	1.03 (0.99-1.46)	1.04 (0.96-1.14)
	Min - Max	0.95-1.96	0.96-1.96	0.95-1.17
	N missing	2	2	0
	Post Sx - folder change from Baseline				0.796*
	Total N	9	6	3
	Mean (Std Dev)	1.2 (0.25)	1.23 (0.17)	1.15 (0.42)
	Median (Q1-Q3)	1.28 (1.17-1.34)	1.25 (1.17-1.34)	1.3 (0.67-1.47)
	Min - Max	0.67-1.47	0.95-1.44	0.67-1.47
	N missing	5	4	1
MIG	Mean Baseline				0.322*
	Total N	14	10	4
	Mean (Std Dev)	27.84 (20.73)	25.26 (20.44)	34.29 (23.04)
	Median (Q1-Q3)	19.93 (11.92-38.61)	13.4 (10.02-38.61)	24.97 (19.93-48.65)
	Min - Max	8.92-69.74	8.92-69.74	18.99-68.23
	W6D1 - folder change from Baseline				0.61*
	Total N	12	8	4
	Mean (Std Dev)	1.85 (1.53)	2 (1.88)	1.53 (0.4)
	Median (Q1-Q3)	1.34 (1-1.86)	1.23 (0.88-2.75)	1.57 (1.2-1.86)
	Min - Max	0.48-5.84	0.48-5.84	1.06-1.91
	N missing	2	2	0
	Post Tx - folder change from Baseline				0.234*
	Total N	12	8	4
	Mean (Std Dev)	1.23 (0.94)	1.24 (1.16)	1.21 (0.32)
	Median (Q1-Q3)	0.82 (0.65-1.4)	0.66 (0.6-1.54)	1.23 (1.01-1.4)
	Min - Max	0.55-3.74	0.55-3.74	0.79-1.57
	N missing	2	2	0
	Post Sx - folder change from Baseline				1*
	Total N	9	6	3
	Mean (Std Dev)	1.83 (1.11)	1.96 (1.22)	1.57 (1.01)
	Median (Q1-Q3)	1.72 (1.3-1.86)	1.56 (1.3-1.86)	1.8 (0.46-2.44)
	Min - Max	0.46-4.39	1.1-4.39	0.46-2.44
	N missing	5	4	1
MIP-1a	Mean Baseline				0.322*
	Total N	14	10	4
	Mean (Std Dev)	3.32 (0.99)	3.15 (0.91)	3.73 (1.2)
	Median (Q1-Q3)	3.12 (2.48-4.41)	3.09 (2.26-3.49)	3.78 (2.71-4.76)
	Min - Max	2.02-4.9	2.02-4.78	2.48-4.9
	W6D1 - folder change from Baseline				1*
	Total N	12	8	4
	Mean (Std Dev)	1.07 (0.27)	1.08 (0.32)	1.05 (0.2)
	Median (Q1-Q3)	1.02 (0.85-1.2)	0.99 (0.85-1.26)	1.08 (0.9-1.2)
	Min - Max	0.79-1.66	0.81-1.66	0.79-1.26
	N missing	2	2	0
	Post Tx - folder change from Baseline				0.308*
	Total N	12	8	4
	Mean (Std Dev)	1.01 (0.36)	1.11 (0.42)	0.83 (0.09)
	Median (Q1-Q3)	0.91 (0.75-1.19)	0.97 (0.76-1.47)	0.83 (0.75-0.91)
	Min - Max	0.67-1.8	0.67-1.8	0.73-0.92
	N missing	2	2	0
	Post Sx - folder change from Baseline				0.439*
	Total N	9	6	3
	Mean (Std Dev)	1.35 (0.41)	1.31 (0.31)	1.45 (0.64)
	Median (Q1-Q3)	1.19 (1.07-1.74)	1.16 (1.07-1.67)	1.79 (0.71-1.85)
	Min - Max	0.71-1.85	1.03-1.74	0.71-1.85
	N missing	5	4	1
Rantes	Mean Baseline				0.12*
	Total N	14	10	4
	Mean (Std Dev)	3010.51 (2255.21)	2648.54 (2259.18)	3915.42 (2280.13)
	Median (Q1-Q3)	1940.85 (1296.83-5602.52)	1365.9 (1218.09-4201.22)	4067.26 (1960.06-5870.78)
	Min - Max	648.51-7277.9	648.51-7277.9	1578.5-5948.66
	W6D1 - folder change from Baseline				0.234*
	Total N	12	8	4
	Mean (Std Dev)	3.72 (6.14)	5.04 (7.3)	1.09 (0.49)
	Median (Q1-Q3)	1.34 (0.86-2.26)	1.66 (1-6.68)	0.9 (0.8-1.38)
	Min - Max	0.46-21.14	0.46-21.14	0.75-1.82
	N missing	2	2	0
	Post Tx - folder change from Baseline				0.062*
	Total N	12	8	4
	Mean (Std Dev)	2.18 (2.14)	2.64 (2.47)	1.25 (0.91)
	Median (Q1-Q3)	1.47 (1.01-2.62)	1.58 (1.35-2.9)	0.9 (0.7-1.8)
	Min - Max	0.6-8.49	1.01-8.49	0.6-2.59
	N missing	2	2	0
	Post Sx - folder change from Baseline				0.439*
	Total N	9	6	3
	Mean (Std Dev)	2.1 (3.36)	1.19 (1.3)	3.91 (5.8)
	Median (Q1-Q3)	0.66 (0.29-2.33)	0.57 (0.25-2.33)	0.66 (0.47-10.61)
	Min - Max	0.17-10.61	0.17-3.27	0.47-10.61
	N missing	5	4	1
S100A8	Mean Baseline				0.376*
	Total N	14	10	4
	Mean (Std Dev)	66.65 (151.69)	75.6 (178.72)	44.27 (54.28)
	Median (Q1-Q3)	11.8 (11.8-28.68)	11.8 (11.8-11.8)	20.24 (11.8-76.74)
	Min - Max	11.8-580.45	11.8-580.45	11.8-124.8
	W6D1 - folder change from Baseline				0.85*
	Total N	12	8	4
	Mean (Std Dev)	1.42 (1.71)	1.62 (2.1)	1.02 (0.27)
	Median (Q1-Q3)	1 (1-1.04)	1 (1-1.04)	1 (0.85-1.18)
	Min - Max	0.15-6.77	0.15-6.77	0.71-1.36
	N missing	2	2	0
	Post Tx - folder change from Baseline				0.587*
	Total N	12	8	4
	Mean (Std Dev)	3.69 (7.23)	4.91 (8.75)	1.26 (0.96)
	Median (Q1-Q3)	1 (1-1.9)	1 (1-4.61)	1 (0.71-1.82)
	Min - Max	0.35-25.66	0.35-25.66	0.41-2.65
	N missing	2	2	0
	Post Sx - folder change from Baseline				0.345*
	Total N	9	6	3
	Mean (Std Dev)	1.83 (1.65)	1.64 (1.92)	2.21 (1.15)
	Median (Q1-Q3)	1 (1-2.34)	1 (1-1.09)	2.34 (1-3.29)
	Min - Max	0.24-5.49	0.24-5.49	1-3.29
	N missing	5	4	1
Tie-2	Mean Baseline				1*
	Total N	14	10	4
	Mean (Std Dev)	11237.48 (6769.23)	10145.83 (4614.32)	13966.62 (10990.22)
	Median (Q1-Q3)	8910.4 (7325.67-14704.69)	8910.4 (7624.08-14704.69)	10035.85 (6633.86-21299.39)
	Min - Max	2981.89-29852.74	2981.89-16923.3	5942.05-29852.74
	W6D1 - folder change from Baseline				0.61*
	Total N	12	8	4
	Mean (Std Dev)	0.85 (0.16)	0.82 (0.11)	0.9 (0.25)
	Median (Q1-Q3)	0.83 (0.71-0.94)	0.83 (0.71-0.91)	0.84 (0.72-1.09)
	Min - Max	0.68-1.24	0.68-0.95	0.7-1.24
	N missing	2	2	0
	Post Tx - folder change from Baseline				0.734*
	Total N	12	8	4
	Mean (Std Dev)	0.8 (0.27)	0.82 (0.27)	0.77 (0.29)
	Median (Q1-Q3)	0.79 (0.58-0.92)	0.79 (0.62-0.92)	0.7 (0.54-0.99)
	Min - Max	0.51-1.37	0.51-1.37	0.53-1.16
	N missing	2	2	0
	Post Sx - folder change from Baseline				0.796*
	Total N	9	6	3
	Mean (Std Dev)	1.09 (0.25)	1.11 (0.25)	1.06 (0.3)
	Median (Q1-Q3)	1.02 (0.89-1.34)	1.1 (0.89-1.34)	1.02 (0.78-1.38)
	Min - Max	0.78-1.4	0.8-1.4	0.78-1.38
	N missing	5	4	1
VEGF	Mean Baseline				0.258*
	Total N	14	10	4
	Mean (Std Dev)	13.8 (14.61)	9 (6.19)	25.79 (23.27)
	Median (Q1-Q3)	9.77 (4.74-12.29)	7.94 (4.74-10.98)	23.03 (6.91-44.67)
	Min - Max	2.92-53.92	2.92-24.03	3.18-53.92
	W6D1 - folder change from Baseline				0.174*
	Total N	12	8	4
	Mean (Std Dev)	5.82 (4.86)	7.18 (5.48)	3.1 (1.25)
	Median (Q1-Q3)	4.66 (2.42-6.09)	4.82 (3.58-11.15)	2.66 (2.24-3.95)
	Min - Max	2.06-16.29	2.06-16.29	2.18-4.89
	N missing	2	2	0
	Post Tx - folder change from Baseline				0.61*
	Total N	12	8	4
	Mean (Std Dev)	2.65 (1.66)	2.92 (1.92)	2.11 (0.91)
	Median (Q1-Q3)	2.36 (1.48-3.37)	2.36 (1.59-3.74)	2.11 (1.4-2.81)
	Min - Max	1.01-6.97	1.01-6.97	1.04-3.16
	N missing	2	2	0
	Post Sx - folder change from Baseline				0.796*
	Total N	9	6	3
	Mean (Std Dev)	0.79 (0.49)	0.84 (0.52)	0.69 (0.53)
	Median (Q1-Q3)	0.77 (0.32-1.07)	0.75 (0.32-1.38)	0.93 (0.08-1.07)
	Min - Max	0.08-1.53	0.31-1.53	0.08-1.07
	N missing	5	4	1
VEGF-C	Mean Baseline				0.258*
	Total N	14	10	4
	Mean (Std Dev)	179.79 (134.39)	200.37 (140.72)	128.34 (117.98)
	Median (Q1-Q3)	167.78 (44.93-299.11)	206.75 (58.45-315.44)	126.35 (27.97-228.72)
	Min - Max	11-409.69	20.14-409.69	11-249.67
	W6D1 - folder change from Baseline				0.497*
	Total N	12	8	4
	Mean (Std Dev)	1.05 (0.46)	1.1 (0.4)	0.96 (0.64)
	Median (Q1-Q3)	1.05 (0.65-1.37)	1.15 (0.88-1.37)	0.79 (0.5-1.43)
	Min - Max	0.39-1.85	0.39-1.6	0.43-1.85
	N missing	2	2	0
	Post Tx - folder change from Baseline				0.308*
	Total N	12	8	4
	Mean (Std Dev)	1.28 (0.7)	1.45 (0.78)	0.93 (0.39)
	Median (Q1-Q3)	1.12 (0.82-1.48)	1.28 (0.82-1.88)	1.02 (0.69-1.16)
	Min - Max	0.38-2.95	0.7-2.95	0.38-1.3
	N missing	2	2	0
	Post Sx - folder change from Baseline				1*
	Total N	9	6	3
	Mean (Std Dev)	1.77 (2.37)	1.1 (0.56)	3.1 (4.2)
	Median (Q1-Q3)	1 (0.74-1.65)	0.98 (0.74-1.65)	1 (0.36-7.94)
	Min - Max	0.36-7.94	0.41-1.86	0.36-7.94
	N missing	5	4	1
VEGF-R2	Mean Baseline				0.12*
	Total N	14	10	4
	Mean (Std Dev)	8743.78 (2067.93)	9255.9 (2184.7)	7463.49 (1073.45)
	Median (Q1-Q3)	8481.06 (7157.08-9402.39)	8791.1 (7301.98-11168.51)	7415.49 (6620.13-8306.85)
	Min - Max	6279.99-12757.93	6528.24-12757.93	6279.99-8742.99
	W6D1 - folder change from Baseline				0.61*
	Total N	12	8	4
	Mean (Std Dev)	0.68 (0.18)	0.67 (0.18)	0.7 (0.2)
	Median (Q1-Q3)	0.66 (0.54-0.76)	0.63 (0.54-0.73)	0.71 (0.57-0.82)
	Min - Max	0.45-1.03	0.49-1.03	0.45-0.93
	N missing	2	2	0
	Post Tx - folder change from Baseline				0.396*
	Total N	12	8	4
	Mean (Std Dev)	0.59 (0.12)	0.58 (0.06)	0.6 (0.21)
	Median (Q1-Q3)	0.58 (0.56-0.63)	0.58 (0.56-0.6)	0.61 (0.46-0.74)
	Min - Max	0.33-0.85	0.47-0.66	0.33-0.85
	N missing	2	2	0
	Post Sx - folder change from Baseline				0.439*
	Total N	9	6	3
	Mean (Std Dev)	1.13 (0.21)	1.13 (0.26)	1.13 (0.1)
	Median (Q1-Q3)	1.1 (1.01-1.17)	1.09 (0.95-1.14)	1.17 (1.01-1.19)
	Min - Max	0.89-1.63	0.89-1.63	1.01-1.19
	N missing	5	4	1
c-MET	Mean Baseline				0.671*
	Total N	14	10	4
	Mean (Std Dev)	172186.05 (47680.5)	176710.46 (51608.06)	160875.03 (40280.71)
	Median (Q1-Q3)	160491.25 (133394-216820.2)	160491.25 (140021.8-226789.9)	148514.3 (131522.65-190227.4)
	Min - Max	114121.35-262173.2	114121.35-262173.2	129651.3-216820.2
	W6D1 - folder change from Baseline				0.126*
	Total N	12	8	4
	Mean (Std Dev)	1.18 (0.21)	1.14 (0.21)	1.27 (0.18)
	Median (Q1-Q3)	1.16 (1.05-1.24)	1.1 (1.03-1.19)	1.24 (1.15-1.38)
	Min - Max	0.87-1.6	0.87-1.6	1.07-1.51
	N missing	2	2	0
	Post Tx - folder change from Baseline				0.174*
	Total N	12	8	4
	Mean (Std Dev)	1.09 (0.18)	1.03 (0.16)	1.19 (0.17)
	Median (Q1-Q3)	1.08 (0.95-1.22)	1 (0.89-1.18)	1.14 (1.08-1.31)
	Min - Max	0.85-1.43	0.85-1.26	1.06-1.43
	N missing	2	2	0
	Post Sx - folder change from Baseline				0.439*
	Total N	9	6	3
	Mean (Std Dev)	1.1 (0.1)	1.07 (0.07)	1.14 (0.15)
	Median (Q1-Q3)	1.08 (1.03-1.15)	1.07 (1.03-1.09)	1.15 (0.99-1.29)
	Min - Max	0.99-1.29	0.99-1.2	0.99-1.29
	N missing	5	4	1
** The p-value is calculated by ANOVA test (parametric) or Kruskal-Wallis test (non-parametric) for numerical covariates, where appropriate.
* Non-parametric test: Kruskal-Wallis test is applied.

## Sheet: Supplementary Table 4
Supplementary Table 4. Summary of Cytokines with Tumor Shrink 25
			Tumor Shrink >=25%
Biomarkers	Covariate	Total N=308 (100%)	Yes N=176 (57.14%)	No N=132 (42.86%)	P-value**
AFP	Mean Baseline				0.796*
	Total N	14	8	6
	Mean (Std Dev)	647.28 (217.18)	670.49 (201.09)	616.33 (252.99)
	Median (Q1-Q3)	596.04 (512.12-868.6)	641.33 (497.47-885.02)	549.25 (518.09-688.95)
	Min - Max	320.32-1072.15	405.57-910.69	320.32-1072.15
	W6D1 - folder change from Baseline				0.81*
	Total N	12	6	6
	Mean (Std Dev)	0.72 (0.28)	0.76 (0.31)	0.68 (0.27)
	Median (Q1-Q3)	0.69 (0.47-0.97)	0.75 (0.45-1)	0.69 (0.48-0.94)
	Min - Max	0.27-1.19	0.41-1.19	0.27-1
	N missing	2	2	0
	Post Tx - folder change from Baseline				0.078*
	Total N	12	6	6
	Mean (Std Dev)	0.87 (0.4)	1.08 (0.45)	0.67 (0.22)
	Median (Q1-Q3)	0.88 (0.56-1.01)	0.97 (0.91-1.35)	0.62 (0.54-0.85)
	Min - Max	0.4-1.79	0.47-1.79	0.4-1
	N missing	2	2	0
	Post Sx - folder change from Baseline				0.327*
	Total N	9	4	5
	Mean (Std Dev)	0.88 (0.3)	0.89 (0.47)	0.87 (0.1)
	Median (Q1-Q3)	0.81 (0.76-0.9)	0.77 (0.6-1.18)	0.86 (0.81-0.9)
	Min - Max	0.46-1.57	0.46-1.57	0.76-1.03
	N missing	5	4	1
AXL	Mean Baseline				0.366*
	Total N	14	8	6
	Mean (Std Dev)	1009.55 (447.41)	1066.29 (368.89)	933.9 (563.84)
	Median (Q1-Q3)	999.09 (664.14-1229.96)	1099.61 (825.6-1310.99)	836.24 (570.47-1039.63)
	Min - Max	357.85-1962.99	467.27-1590.65	357.85-1962.99
	W6D1 - folder change from Baseline				0.873*
	Total N	12	6	6
	Mean (Std Dev)	1.75 (0.81)	1.95 (1.04)	1.54 (0.52)
	Median (Q1-Q3)	1.67 (1.33-1.95)	1.56 (1.32-2.2)	1.7 (1.35-1.8)
	Min - Max	0.61-3.94	1.14-3.94	0.61-2.1
	N missing	2	2	0
	Post Tx - folder change from Baseline				0.522*
	Total N	12	6	6
	Mean (Std Dev)	1.82 (0.91)	1.97 (1.01)	1.67 (0.86)
	Median (Q1-Q3)	1.37 (1.35-2.42)	1.45 (1.36-2.44)	1.36 (1.35-2.41)
	Min - Max	0.58-3.85	1.28-3.85	0.58-2.96
	N missing	2	2	0
	Post Sx - folder change from Baseline				1*
	Total N	9	4	5
	Mean (Std Dev)	1.31 (0.44)	1.36 (0.47)	1.26 (0.47)
	Median (Q1-Q3)	1.3 (1.09-1.6)	1.23 (1.03-1.7)	1.3 (1.12-1.6)
	Min - Max	0.54-2.01	0.96-2.01	0.54-1.74
	N missing	5	4	1
Angiopoietin-1	Mean Baseline				0.366*
	Total N	14	8	6
	Mean (Std Dev)	1592.47 (1364.21)	1516.59 (1670.7)	1693.64 (953.69)
	Median (Q1-Q3)	1141.81 (720.65-2151.07)	939.58 (645.37-1468.62)	1931.44 (818.73-2307.95)
	Min - Max	326.77-5543.7	481.9-5543.7	326.77-2845.52
	W6D1 - folder change from Baseline				0.262*
	Total N	12	6	6
	Mean (Std Dev)	2.15 (2)	2.79 (2.67)	1.5 (0.77)
	Median (Q1-Q3)	1.89 (1.08-2.35)	2.17 (1.19-2.53)	1.43 (1.01-2.08)
	Min - Max	0.47-8.06	0.64-8.06	0.47-2.57
	N missing	2	2	0
	Post Tx - folder change from Baseline				0.262*
	Total N	12	6	6
	Mean (Std Dev)	1.86 (1.44)	2.41 (1.77)	1.31 (0.84)
	Median (Q1-Q3)	1.25 (0.85-2.37)	1.76 (0.96-4.46)	1.01 (0.6-2.34)
	Min - Max	0.53-4.78	0.76-4.78	0.53-2.4
	N missing	2	2	0
	Post Sx - folder change from Baseline				0.806*
	Total N	9	4	5
	Mean (Std Dev)	2.36 (4.97)	1.04 (0.95)	3.42 (6.75)
	Median (Q1-Q3)	0.47 (0.25-1.84)	1.05 (0.22-1.86)	0.47 (0.42-0.52)
	Min - Max	0.2-15.49	0.2-1.88	0.21-15.49
	N missing	5	4	1
Angiopoietin-2	Mean Baseline				0.053*
	Total N	14	8	6
	Mean (Std Dev)	2824.88 (2346.01)	1875.45 (1338.58)	4090.78 (2904.48)
	Median (Q1-Q3)	1741.56 (1510.07-3518.99)	1565.38 (1313.94-1741.56)	3095.26 (2445.55-5097.62)
	Min - Max	693.39-9446.63	693.39-5068.47	1364.37-9446.63
	W6D1 - folder change from Baseline				0.631*
	Total N	12	6	6
	Mean (Std Dev)	0.76 (0.32)	0.87 (0.32)	0.64 (0.31)
	Median (Q1-Q3)	0.79 (0.54-0.89)	0.79 (0.76-0.83)	0.7 (0.34-0.9)
	Min - Max	0.27-1.49	0.57-1.49	0.27-0.95
	N missing	2	2	0
	Post Tx - folder change from Baseline				0.262*
	Total N	12	6	6
	Mean (Std Dev)	0.61 (0.28)	0.71 (0.29)	0.5 (0.25)
	Median (Q1-Q3)	0.65 (0.37-0.75)	0.7 (0.62-0.75)	0.48 (0.29-0.75)
	Min - Max	0.2-1.2	0.3-1.2	0.2-0.83
	N missing	2	2	0
	Post Sx - folder change from Baseline				0.462*
	Total N	9	4	5
	Mean (Std Dev)	1.04 (0.32)	1.11 (0.28)	0.98 (0.37)
	Median (Q1-Q3)	1.03 (0.77-1.22)	1.12 (0.9-1.33)	0.93 (0.65-1.17)
	Min - Max	0.64-1.51	0.77-1.44	0.64-1.51
	N missing	5	4	1
CEA	Mean Baseline				0.02*
	Total N	14	8	6
	Mean (Std Dev)	596.06 (807.92)	909.34 (969.85)	178.35 (117.58)
	Median (Q1-Q3)	256.98 (161.34-659.15)	535.44 (235.28-1548.12)	152.5 (113.44-243.18)
	Min - Max	35.29-2475.76	161.34-2475.76	35.29-373.18
	W6D1 - folder change from Baseline				0.873*
	Total N	12	6	6
	Mean (Std Dev)	1.12 (0.62)	1.19 (0.74)	1.05 (0.54)
	Median (Q1-Q3)	1.02 (0.8-1.39)	0.98 (0.92-1.38)	1.09 (0.67-1.41)
	Min - Max	0.27-2.55	0.35-2.55	0.27-1.8
	N missing	2	2	0
	Post Tx - folder change from Baseline				0.873*
	Total N	12	6	6
	Mean (Std Dev)	1.59 (1.22)	1.41 (0.39)	1.76 (1.74)
	Median (Q1-Q3)	1.28 (1.06-1.77)	1.35 (1.13-1.63)	1.28 (0.55-1.91)
	Min - Max	0.42-5.14	0.98-2.03	0.42-5.14
	N missing	2	2	0
	Post Sx - folder change from Baseline				0.327*
	Total N	9	4	5
	Mean (Std Dev)	1.19 (0.71)	0.92 (0.29)	1.41 (0.9)
	Median (Q1-Q3)	0.94 (0.75-1.27)	0.84 (0.71-1.13)	1.11 (0.91-1.27)
	Min - Max	0.69-2.97	0.69-1.33	0.75-2.97
	N missing	5	4	1
Eotaxin-3	Mean Baseline				0.07*
	Total N	14	8	6
	Mean (Std Dev)	6.21 (1.93)	5.33 (1.51)	7.37 (1.92)
	Median (Q1-Q3)	6.26 (4.96-7.29)	5.29 (4.13-6.62)	7.6 (6.23-8.64)
	Min - Max	3.3-9.8	3.3-7.29	4.37-9.8
	W6D1 - folder change from Baseline				0.423*
	Total N	12	6	6
	Mean (Std Dev)	1.24 (0.22)	1.18 (0.29)	1.29 (0.11)
	Median (Q1-Q3)	1.23 (1.14-1.4)	1.14 (1.11-1.48)	1.3 (1.18-1.38)
	Min - Max	0.71-1.52	0.71-1.52	1.15-1.42
	N missing	2	2	0
	Post Tx - folder change from Baseline				0.055*
	Total N	12	6	6
	Mean (Std Dev)	0.98 (0.15)	1.05 (0.16)	0.91 (0.1)
	Median (Q1-Q3)	0.98 (0.86-1.08)	1.08 (1.04-1.1)	0.95 (0.8-0.98)
	Min - Max	0.74-1.23	0.74-1.23	0.77-0.98
	N missing	2	2	0
	Post Sx - folder change from Baseline				0.806*
	Total N	9	4	5
	Mean (Std Dev)	0.84 (0.19)	0.83 (0.17)	0.86 (0.23)
	Median (Q1-Q3)	0.82 (0.68-1)	0.84 (0.68-0.97)	0.82 (0.68-1.04)
	Min - Max	0.61-1.13	0.62-1	0.61-1.13
	N missing	5	4	1
GAS6	Mean Baseline				0.366*
	Total N	14	8	6
	Mean (Std Dev)	6638.06 (2504.84)	6193.11 (2018.15)	7231.32 (3141.93)
	Median (Q1-Q3)	6259.67 (4718.98-7067.1)	6259.67 (4526.38-6979.13)	6189.07 (4902.31-8466.67)
	Min - Max	3867.19-12921.84	3867.19-10147.31	4718.98-12921.84
	W6D1 - folder change from Baseline				0.262*
	Total N	12	6	6
	Mean (Std Dev)	1.78 (0.67)	2 (0.85)	1.55 (0.37)
	Median (Q1-Q3)	1.7 (1.22-2.22)	2.22 (1.12-2.4)	1.55 (1.31-1.83)
	Min - Max	0.89-3.16	0.89-3.16	0.99-2.05
	N missing	2	2	0
	Post Tx - folder change from Baseline				0.873*
	Total N	12	6	6
	Mean (Std Dev)	1.36 (0.54)	1.38 (0.61)	1.35 (0.53)
	Median (Q1-Q3)	1.18 (0.98-1.6)	1.19 (0.89-1.62)	1.18 (1.07-1.59)
	Min - Max	0.77-2.49	0.89-2.49	0.77-2.3
	N missing	2	2	0
	Post Sx - folder change from Baseline				0.086*
	Total N	9	4	5
	Mean (Std Dev)	0.69 (0.19)	0.82 (0.13)	0.59 (0.16)
	Median (Q1-Q3)	0.68 (0.58-0.81)	0.83 (0.71-0.93)	0.58 (0.48-0.68)
	Min - Max	0.4-0.95	0.66-0.95	0.4-0.81
	N missing	5	4	1
HGF	Mean Baseline				0.477*
	Total N	14	8	6
	Mean (Std Dev)	71.42 (34.91)	66.19 (27.2)	78.4 (45.07)
	Median (Q1-Q3)	64.74 (44.19-101.76)	58.36 (44.44-80.06)	89.98 (44.19-117.7)
	Min - Max	7.29-121.27	43.94-119.85	7.29-121.27
	W6D1 - folder change from Baseline				0.262*
	Total N	12	6	6
	Mean (Std Dev)	1.07 (0.44)	1.22 (0.54)	0.92 (0.27)
	Median (Q1-Q3)	0.99 (0.81-1.21)	1.06 (0.98-1.29)	0.88 (0.8-1.19)
	Min - Max	0.52-2.25	0.7-2.25	0.52-1.23
	N missing	2	2	0
	Post Tx - folder change from Baseline				0.15*
	Total N	12	6	6
	Mean (Std Dev)	13.3 (33.09)	25.86 (45.07)	0.75 (0.25)
	Median (Q1-Q3)	0.98 (0.55-1.17)	1.17 (0.94-38.82)	0.72 (0.53-1.02)
	Min - Max	0.5-112.5	0.52-112.5	0.5-1.02
	N missing	2	2	0
	Post Sx - folder change from Baseline				1*
	Total N	9	4	5
	Mean (Std Dev)	0.88 (0.32)	0.92 (0.34)	0.84 (0.35)
	Median (Q1-Q3)	0.88 (0.8-1.03)	0.89 (0.67-1.17)	0.88 (0.88-1.03)
	Min - Max	0.25-1.36	0.55-1.36	0.25-1.15
	N missing	5	4	1
I-TAC	Mean Baseline				0.366*
	Total N	14	8	6
	Mean (Std Dev)	7.81 (3.81)	6.48 (2.47)	9.58 (4.75)
	Median (Q1-Q3)	6.93 (6.07-10.21)	6.54 (6.18-7.45)	10.19 (5.99-13.43)
	Min - Max	1.31-14.6	1.31-10.21	3.09-14.6
	W6D1 - folder change from Baseline				0.055*
	Total N	12	6	6
	Mean (Std Dev)	2.13 (1.03)	2.62 (1.14)	1.65 (0.69)
	Median (Q1-Q3)	1.96 (1.41-2.53)	2.21 (1.98-3.18)	1.56 (1.03-1.95)
	Min - Max	0.99-4.65	1.46-4.65	0.99-2.81
	N missing	2	2	0
	Post Tx - folder change from Baseline				0.423*
	Total N	12	6	6
	Mean (Std Dev)	1.45 (0.72)	1.65 (0.84)	1.26 (0.59)
	Median (Q1-Q3)	1.24 (1.02-1.71)	1.31 (1.15-1.97)	1.18 (0.91-1.46)
	Min - Max	0.54-3.21	0.97-3.21	0.54-2.28
	N missing	2	2	0
	Post Sx - folder change from Baseline				0.327*
	Total N	9	4	5
	Mean (Std Dev)	0.98 (0.42)	0.81 (0.29)	1.12 (0.49)
	Median (Q1-Q3)	0.9 (0.75-1.27)	0.84 (0.61-1.01)	1.27 (0.75-1.42)
	Min - Max	0.44-1.66	0.44-1.13	0.48-1.66
	N missing	5	4	1
IGF-I	Mean Baseline				0.606*
	Total N	14	8	6
	Mean (Std Dev)	59945.01 (16692.24)	61556.5 (13527.42)	57796.37 (21413.97)
	Median (Q1-Q3)	59386.73 (50785.7-64716.15)	61613.1 (51691.85-68055.95)	55660.35 (50785.7-64478.8)
	Min - Max	27380.45-92812.55	43230.55-86499.65	27380.45-92812.55
	W6D1 - folder change from Baseline				0.631*
	Total N	12	6	6
	Mean (Std Dev)	0.81 (0.16)	0.83 (0.19)	0.79 (0.14)
	Median (Q1-Q3)	0.86 (0.64-0.9)	0.89 (0.63-0.91)	0.81 (0.64-0.88)
	Min - Max	0.57-1.08	0.57-1.08	0.62-0.96
	N missing	2	2	0
	Post Tx - folder change from Baseline				0.522*
	Total N	12	6	6
	Mean (Std Dev)	0.73 (0.16)	0.72 (0.15)	0.75 (0.18)
	Median (Q1-Q3)	0.77 (0.61-0.8)	0.72 (0.61-0.8)	0.8 (0.61-0.81)
	Min - Max	0.47-1	0.53-0.97	0.47-1
	N missing	2	2	0
	Post Sx - folder change from Baseline				0.462*
	Total N	9	4	5
	Mean (Std Dev)	1.25 (0.37)	1.36 (0.34)	1.16 (0.4)
	Median (Q1-Q3)	1.26 (0.95-1.54)	1.35 (1.11-1.61)	1.17 (0.93-1.54)
	Min - Max	0.61-1.77	0.95-1.77	0.61-1.54
	N missing	5	4	1
IP-10	Mean Baseline				0.366*
	Total N	14	8	6
	Mean (Std Dev)	81.88 (36.9)	91.17 (42.96)	69.5 (25.17)
	Median (Q1-Q3)	77.47 (50.91-113.78)	101.54 (45.87-123.02)	64.9 (54.08-97.53)
	Min - Max	35.41-149.3	39.21-149.3	35.41-100.16
	W6D1 - folder change from Baseline				0.873*
	Total N	12	6	6
	Mean (Std Dev)	1.93 (1.2)	2.15 (1.62)	1.71 (0.66)
	Median (Q1-Q3)	1.55 (1.16-2.42)	1.55 (1.12-3.97)	1.55 (1.2-1.98)
	Min - Max	0.38-4.36	0.38-4.36	1.11-2.87
	N missing	2	2	0
	Post Tx - folder change from Baseline				0.749*
	Total N	12	6	6
	Mean (Std Dev)	1.28 (0.5)	1.3 (0.59)	1.26 (0.44)
	Median (Q1-Q3)	1.22 (0.94-1.61)	1.13 (0.92-1.53)	1.29 (0.95-1.7)
	Min - Max	0.61-2.38	0.74-2.38	0.61-1.74
	N missing	2	2	0
	Post Sx - folder change from Baseline				0.624*
	Total N	9	4	5
	Mean (Std Dev)	1.55 (0.73)	1.46 (0.96)	1.62 (0.61)
	Median (Q1-Q3)	1.5 (1.04-2.04)	1.05 (0.94-1.98)	1.86 (1.5-2.04)
	Min - Max	0.62-2.89	0.85-2.89	0.62-2.1
	N missing	5	4	1
MCP-1	Mean Baseline				0.199*
	Total N	13	7	6
	Mean (Std Dev)	44.91 (14.68)	40.39 (15.41)	50.18 (13.06)
	Median (Q1-Q3)	43.39 (36.09-47.28)	40.49 (29.92-46.84)	45.33 (42.21-62)
	Min - Max	17.03-70.11	17.03-66.35	36.09-70.11
	W6D1 - folder change from Baseline				0.465*
	Total N	11	5	6
	Mean (Std Dev)	1.41 (0.3)	1.47 (0.35)	1.36 (0.27)
	Median (Q1-Q3)	1.4 (1.19-1.66)	1.44 (1.36-1.66)	1.33 (1.19-1.41)
	Min - Max	0.97-1.91	0.97-1.91	1.06-1.84
	N missing	2	2	0
	Post Tx - folder change from Baseline				0.361*
	Total N	11	5	6
	Mean (Std Dev)	1.6 (0.69)	1.86 (0.91)	1.38 (0.42)
	Median (Q1-Q3)	1.34 (1.13-2.05)	1.39 (1.34-2.77)	1.15 (1.13-1.76)
	Min - Max	0.92-2.9	0.92-2.9	1.05-2.05
	N missing	2	2	0
	Post Sx - folder change from Baseline				0.655*
	Total N	8	3	5
	Mean (Std Dev)	1.07 (0.46)	0.98 (0.57)	1.12 (0.44)
	Median (Q1-Q3)	1.06 (0.67-1.49)	0.87 (0.48-1.6)	1.24 (0.83-1.39)
	Min - Max	0.48-1.62	0.48-1.6	0.52-1.62
	N missing	5	4	1
MCP-2	Mean Baseline				0.302*
	Total N	14	8	6
	Mean (Std Dev)	16.52 (2.61)	17.19 (2.22)	15.62 (3.01)
	Median (Q1-Q3)	16.76 (14.85-17.99)	17.31 (15.67-18.09)	15.75 (12.59-17.81)
	Min - Max	12.07-21.32	14.1-21.32	12.07-19.77
	W6D1 - folder change from Baseline				0.337*
	Total N	12	6	6
	Mean (Std Dev)	1.19 (0.2)	1.22 (0.2)	1.16 (0.21)
	Median (Q1-Q3)	1.15 (1.1-1.19)	1.16 (1.13-1.2)	1.14 (1.04-1.18)
	Min - Max	0.94-1.62	1.08-1.62	0.94-1.55
	N missing	2	2	0
	Post Tx - folder change from Baseline				0.15*
	Total N	12	6	6
	Mean (Std Dev)	1.17 (0.31)	1.31 (0.39)	1.03 (0.09)
	Median (Q1-Q3)	1.03 (0.97-1.3)	1.23 (1-1.48)	1 (0.96-1.12)
	Min - Max	0.95-1.96	0.98-1.96	0.95-1.17
	N missing	2	2	0
	Post Sx - folder change from Baseline				0.624*
	Total N	9	4	5
	Mean (Std Dev)	1.2 (0.25)	1.21 (0.2)	1.2 (0.31)
	Median (Q1-Q3)	1.28 (1.17-1.34)	1.23 (1.06-1.36)	1.3 (1.21-1.34)
	Min - Max	0.67-1.47	0.95-1.44	0.67-1.47
	N missing	5	4	1
MIG	Mean Baseline				0.302*
	Total N	14	8	6
	Mean (Std Dev)	27.84 (20.73)	25.81 (22.57)	30.54 (19.72)
	Median (Q1-Q3)	19.93 (11.92-38.61)	12.63 (9.95-41.35)	24.97 (18.99-32.63)
	Min - Max	8.92-69.74	8.92-69.74	13.48-68.23
	W6D1 - folder change from Baseline				0.873*
	Total N	12	6	6
	Mean (Std Dev)	1.85 (1.53)	2.31 (2.11)	1.38 (0.42)
	Median (Q1-Q3)	1.34 (1-1.86)	1.35 (0.94-3.93)	1.34 (1.06-1.8)
	Min - Max	0.48-5.84	0.48-5.84	0.82-1.91
	N missing	2	2	0
	Post Tx - folder change from Baseline				0.631*
	Total N	12	6	6
	Mean (Std Dev)	1.23 (0.94)	1.47 (1.28)	0.99 (0.42)
	Median (Q1-Q3)	0.82 (0.65-1.4)	0.76 (0.65-2.24)	1.01 (0.57-1.23)
	Min - Max	0.55-3.74	0.64-3.74	0.55-1.57
	N missing	2	2	0
	Post Sx - folder change from Baseline				0.624*
	Total N	9	4	5
	Mean (Std Dev)	1.83 (1.11)	2.05 (1.56)	1.66 (0.73)
	Median (Q1-Q3)	1.72 (1.3-1.86)	1.35 (1.2-2.89)	1.8 (1.72-1.86)
	Min - Max	0.46-4.39	1.1-4.39	0.46-2.44
	N missing	5	4	1
MIP-1a	Mean Baseline				0.796*
	Total N	14	8	6
	Mean (Std Dev)	3.32 (0.99)	3.25 (0.97)	3.41 (1.11)
	Median (Q1-Q3)	3.12 (2.48-4.41)	3.12 (2.54-3.95)	3.12 (2.48-4.61)
	Min - Max	2.02-4.9	2.02-4.78	2.22-4.9
	W6D1 - folder change from Baseline				1*
	Total N	12	6	6
	Mean (Std Dev)	1.07 (0.27)	1.06 (0.3)	1.08 (0.27)
	Median (Q1-Q3)	1.02 (0.85-1.2)	0.99 (0.87-1.05)	1.08 (0.81-1.26)
	Min - Max	0.79-1.66	0.82-1.66	0.79-1.48
	N missing	2	2	0
	Post Tx - folder change from Baseline				0.423*
	Total N	12	6	6
	Mean (Std Dev)	1.01 (0.36)	1.17 (0.47)	0.86 (0.1)
	Median (Q1-Q3)	0.91 (0.75-1.19)	1.16 (0.69-1.55)	0.86 (0.77-0.92)
	Min - Max	0.67-1.8	0.67-1.8	0.73-0.99
	N missing	2	2	0
	Post Sx - folder change from Baseline				0.624*
	Total N	9	4	5
	Mean (Std Dev)	1.35 (0.41)	1.27 (0.32)	1.42 (0.5)
	Median (Q1-Q3)	1.19 (1.07-1.74)	1.16 (1.09-1.46)	1.67 (1.07-1.79)
	Min - Max	0.71-1.85	1.03-1.74	0.71-1.85
	N missing	5	4	1
Rantes	Mean Baseline				0.302*
	Total N	14	8	6
	Mean (Std Dev)	3010.51 (2255.21)	2860.68 (2496.53)	3210.29 (2100.95)
	Median (Q1-Q3)	1940.85 (1296.83-5602.52)	1365.9 (1211.74-4901.87)	2322.42 (1578.5-5792.9)
	Min - Max	648.51-7277.9	648.51-7277.9	1296.83-5948.66
	W6D1 - folder change from Baseline				0.109*
	Total N	12	6	6
	Mean (Std Dev)	3.72 (6.14)	6.38 (8.12)	1.06 (0.39)
	Median (Q1-Q3)	1.34 (0.86-2.26)	2.24 (1.55-10.66)	0.9 (0.86-1.14)
	Min - Max	0.46-21.14	0.46-21.14	0.75-1.82
	N missing	2	2	0
	Post Tx - folder change from Baseline				0.078*
	Total N	12	6	6
	Mean (Std Dev)	2.18 (2.14)	3.04 (2.79)	1.32 (0.71)
	Median (Q1-Q3)	1.47 (1.01-2.62)	2.12 (1.33-3.15)	1.19 (0.8-1.57)
	Min - Max	0.6-8.49	1.01-8.49	0.6-2.59
	N missing	2	2	0
	Post Sx - folder change from Baseline				0.806*
	Total N	9	4	5
	Mean (Std Dev)	2.1 (3.36)	1.52 (1.53)	2.57 (4.5)
	Median (Q1-Q3)	0.66 (0.29-2.33)	1.31 (0.23-2.8)	0.66 (0.47-0.85)
	Min - Max	0.17-10.61	0.17-3.27	0.25-10.61
	N missing	5	4	1
S100A8	Mean Baseline				0.225*
	Total N	14	8	6
	Mean (Std Dev)	66.65 (151.69)	82.88 (201.05)	45.01 (47.44)
	Median (Q1-Q3)	11.8 (11.8-28.68)	11.8 (11.8-11.8)	20.24 (11.8-81.18)
	Min - Max	11.8-580.45	11.8-580.45	11.8-124.8
	W6D1 - folder change from Baseline				0.211*
	Total N	12	6	6
	Mean (Std Dev)	1.42 (1.71)	1.97 (2.35)	0.87 (0.41)
	Median (Q1-Q3)	1 (1-1.04)	1 (1-1.08)	1 (0.71-1)
	Min - Max	0.15-6.77	1-6.77	0.15-1.36
	N missing	2	2	0
	Post Tx - folder change from Baseline				0.104*
	Total N	12	6	6
	Mean (Std Dev)	3.69 (7.23)	6.31 (9.89)	1.07 (0.83)
	Median (Q1-Q3)	1 (1-1.9)	1.08 (1-8.07)	1 (0.41-1)
	Min - Max	0.35-25.66	1-25.66	0.35-2.65
	N missing	2	2	0
	Post Sx - folder change from Baseline				0.609*
	Total N	9	4	5
	Mean (Std Dev)	1.83 (1.65)	2.15 (2.23)	1.57 (1.22)
	Median (Q1-Q3)	1 (1-2.34)	1.04 (1-3.29)	1 (1-2.34)
	Min - Max	0.24-5.49	1-5.49	0.24-3.29
	N missing	5	4	1
Tie-2	Mean Baseline				0.897*
	Total N	14	8	6
	Mean (Std Dev)	11237.48 (6769.23)	10509.52 (5146.2)	12208.1 (8948.92)
	Median (Q1-Q3)	8910.4 (7325.67-14704.69)	10975.5 (6342.41-14767.59)	8691.06 (7325.67-12746.03)
	Min - Max	2981.89-29852.74	2981.89-16923.3	5942.05-29852.74
	W6D1 - folder change from Baseline				0.522*
	Total N	12	6	6
	Mean (Std Dev)	0.85 (0.16)	0.8 (0.12)	0.89 (0.2)
	Median (Q1-Q3)	0.83 (0.71-0.94)	0.78 (0.7-0.93)	0.86 (0.73-0.94)
	Min - Max	0.68-1.24	0.68-0.95	0.7-1.24
	N missing	2	2	0
	Post Tx - folder change from Baseline				0.423*
	Total N	12	6	6
	Mean (Std Dev)	0.8 (0.27)	0.87 (0.28)	0.74 (0.25)
	Median (Q1-Q3)	0.79 (0.58-0.92)	0.79 (0.65-1)	0.7 (0.53-0.83)
	Min - Max	0.51-1.37	0.6-1.37	0.51-1.16
	N missing	2	2	0
	Post Sx - folder change from Baseline				0.327*
	Total N	9	4	5
	Mean (Std Dev)	1.09 (0.25)	1.19 (0.27)	1.01 (0.23)
	Median (Q1-Q3)	1.02 (0.89-1.34)	1.28 (1-1.37)	0.99 (0.89-1.02)
	Min - Max	0.78-1.4	0.8-1.4	0.78-1.38
	N missing	5	4	1
VEGF	Mean Baseline				0.519*
	Total N	14	8	6
	Mean (Std Dev)	13.8 (14.61)	9.35 (6.5)	19.73 (20.54)
	Median (Q1-Q3)	9.77 (4.74-12.29)	7.94 (5.18-10.44)	11.47 (3.18-35.42)
	Min - Max	2.92-53.92	3.67-24.03	2.92-53.92
	W6D1 - folder change from Baseline				0.01*
	Total N	12	6	6
	Mean (Std Dev)	5.82 (4.86)	8.81 (5.42)	2.83 (1.06)
	Median (Q1-Q3)	4.66 (2.42-6.09)	6.09 (4.69-15.05)	2.42 (2.18-3.01)
	Min - Max	2.06-16.29	4.62-16.29	2.06-4.89
	N missing	2	2	0
	Post Tx - folder change from Baseline				0.337*
	Total N	12	6	6
	Mean (Std Dev)	2.65 (1.66)	3.28 (2.1)	2.02 (0.82)
	Median (Q1-Q3)	2.36 (1.48-3.37)	2.92 (1.98-3.89)	2.11 (1.2-2.47)
	Min - Max	1.01-6.97	1.01-6.97	1.04-3.16
	N missing	2	2	0
	Post Sx - folder change from Baseline				1*
	Total N	9	4	5
	Mean (Std Dev)	0.79 (0.49)	0.84 (0.51)	0.76 (0.54)
	Median (Q1-Q3)	0.77 (0.32-1.07)	0.75 (0.52-1.15)	0.93 (0.32-1.07)
	Min - Max	0.08-1.53	0.31-1.53	0.08-1.38
	N missing	5	4	1
VEGF-C	Mean Baseline				0.121*
	Total N	14	8	6
	Mean (Std Dev)	179.79 (134.39)	228.01 (144.28)	115.51 (95.6)
	Median (Q1-Q3)	167.78 (44.93-299.11)	292.41 (85.28-319.43)	89.84 (44.93-207.76)
	Min - Max	11-409.69	20.14-409.69	11-249.67
	W6D1 - folder change from Baseline				0.749*
	Total N	12	6	6
	Mean (Std Dev)	1.05 (0.46)	1.08 (0.46)	1.03 (0.51)
	Median (Q1-Q3)	1.05 (0.65-1.37)	1.15 (0.72-1.47)	1.02 (0.57-1.27)
	Min - Max	0.39-1.85	0.39-1.6	0.43-1.85
	N missing	2	2	0
	Post Tx - folder change from Baseline				0.337*
	Total N	12	6	6
	Mean (Std Dev)	1.28 (0.7)	1.46 (0.79)	1.09 (0.61)
	Median (Q1-Q3)	1.12 (0.82-1.48)	1.28 (0.88-1.6)	1.02 (0.7-1.3)
	Min - Max	0.38-2.95	0.76-2.95	0.38-2.16
	N missing	2	2	0
	Post Sx - folder change from Baseline				1*
	Total N	9	4	5
	Mean (Std Dev)	1.77 (2.37)	1.06 (0.61)	2.34 (3.17)
	Median (Q1-Q3)	1 (0.74-1.65)	0.98 (0.62-1.5)	1 (0.74-1.65)
	Min - Max	0.36-7.94	0.41-1.86	0.36-7.94
	N missing	5	4	1
VEGF-R2	Mean Baseline				0.093*
	Total N	14	8	6
	Mean (Std Dev)	8743.78 (2067.93)	9578.55 (2225.24)	7630.76 (1258.81)
	Median (Q1-Q3)	8481.06 (7157.08-9402.39)	8791.1 (7779.73-11785.86)	7415.49 (6528.24-8742.99)
	Min - Max	6279.99-12757.93	7157.08-12757.93	6279.99-9402.39
	W6D1 - folder change from Baseline				0.262*
	Total N	12	6	6
	Mean (Std Dev)	0.68 (0.18)	0.64 (0.2)	0.71 (0.16)
	Median (Q1-Q3)	0.66 (0.54-0.76)	0.58 (0.53-0.66)	0.71 (0.66-0.8)
	Min - Max	0.45-1.03	0.49-1.03	0.45-0.93
	N missing	2	2	0
	Post Tx - folder change from Baseline				0.262*
	Total N	12	6	6
	Mean (Std Dev)	0.59 (0.12)	0.56 (0.05)	0.61 (0.17)
	Median (Q1-Q3)	0.58 (0.56-0.63)	0.58 (0.56-0.58)	0.61 (0.57-0.66)
	Min - Max	0.33-0.85	0.47-0.62	0.33-0.85
	N missing	2	2	0
	Post Sx - folder change from Baseline				0.624*
	Total N	9	4	5
	Mean (Std Dev)	1.13 (0.21)	1.15 (0.34)	1.11 (0.07)
	Median (Q1-Q3)	1.1 (1.01-1.17)	1.05 (0.92-1.39)	1.1 (1.08-1.17)
	Min - Max	0.89-1.63	0.89-1.63	1.01-1.19
	N missing	5	4	1
c-MET	Mean Baseline				0.439*
	Total N	14	8	6
	Mean (Std Dev)	172186.05 (47680.5)	183651.1 (55913.56)	156899.32 (32300.56)
	Median (Q1-Q3)	160491.25 (133394-216820.2)	168290.48 (139975.65-238191)	148947.9 (133394-163634.6)
	Min - Max	114121.35-262173.2	114121.35-262173.2	129651.3-216820.2
	W6D1 - folder change from Baseline				0.01*
	Total N	12	6	6
	Mean (Std Dev)	1.18 (0.21)	1.05 (0.11)	1.31 (0.2)
	Median (Q1-Q3)	1.16 (1.05-1.24)	1.05 (1.03-1.14)	1.24 (1.2-1.51)
	Min - Max	0.87-1.6	0.87-1.17	1.07-1.6
	N missing	2	2	0
	Post Tx - folder change from Baseline				0.873*
	Total N	12	6	6
	Mean (Std Dev)	1.09 (0.18)	1.07 (0.17)	1.11 (0.19)
	Median (Q1-Q3)	1.08 (0.95-1.22)	1.06 (0.9-1.25)	1.08 (0.99-1.19)
	Min - Max	0.85-1.43	0.85-1.26	0.87-1.43
	N missing	2	2	0
	Post Sx - folder change from Baseline				1*
	Total N	9	4	5
	Mean (Std Dev)	1.1 (0.1)	1.09 (0.09)	1.1 (0.12)
	Median (Q1-Q3)	1.08 (1.03-1.15)	1.08 (1.03-1.15)	1.06 (1.03-1.15)
	Min - Max	0.99-1.29	0.99-1.2	0.99-1.29
	N missing	5	4	1
** The p-value is calculated by ANOVA test (parametric) or Kruskal-Wallis test (non-parametric) for numerical covariates, where appropriate.
* Non-parametric test: Kruskal-Wallis test is applied.

## Sheet: Supplementary Table 5
Supplementary Table 5. Summary of Cytokines with Percentage Tumor Reduction
			Percentage Tumor Shrinkage
Biomarkers	Variable	N	Pearson CC	Pearson P-value	Spearman CC	Spearman P-value
AFP	Mean Baseline	14	-0.029	0.922	-0.112	0.703
	W6D1 - folder change from Baseline	12	0.031	0.923	-0.049	0.88
	Post Tx - folder change from Baseline	12	0.314	0.321	0.336	0.286
	Post Sx - folder change from Baseline	9	-0.02	0.959	-0.3	0.433
AXL	Mean Baseline	14	0.108	0.713	0.16	0.584
	W6D1 - folder change from Baseline	12	0.061	0.85	-0.049	0.88
	Post Tx - folder change from Baseline	12	-0.065	0.841	0.154	0.633
	Post Sx - folder change from Baseline	9	0.207	0.593	0.233	0.546
Angiopoietin-1	Mean Baseline	14	0.007	0.98	-0.165	0.573
	W6D1 - folder change from Baseline	12	0.483	0.112	0.552	0.063
	Post Tx - folder change from Baseline	12	0.657	0.02	0.573	0.051
	Post Sx - folder change from Baseline	9	-0.201	0.604	0	1
Angiopoietin-2	Mean Baseline	14	-0.592	0.026	-0.569	0.034
	W6D1 - folder change from Baseline	12	0.257	0.42	0.161	0.618
	Post Tx - folder change from Baseline	12	0.567	0.055	0.497	0.101
	Post Sx - folder change from Baseline	9	0.201	0.605	0.333	0.381
CEA	Mean Baseline	14	0.196	0.503	0.587	0.027
	W6D1 - folder change from Baseline	12	0.278	0.381	0.063	0.846
	Post Tx - folder change from Baseline	12	-0.099	0.761	-0.049	0.88
	Post Sx - folder change from Baseline	9	-0.348	0.359	-0.217	0.576
Eotaxin-3	Mean Baseline	14	-0.143	0.627	-0.187	0.522
	W6D1 - folder change from Baseline	12	-0.502	0.096	-0.503	0.095
	Post Tx - folder change from Baseline	12	0.355	0.258	0.392	0.208
	Post Sx - folder change from Baseline	9	-0.188	0.627	-0.133	0.732
GAS6	Mean Baseline	14	-0.369	0.195	-0.455	0.102
	W6D1 - folder change from Baseline	12	-0.017	0.958	-0.007	0.983
	Post Tx - folder change from Baseline	12	-0.29	0.361	-0.203	0.527
	Post Sx - folder change from Baseline	9	0.452	0.222	0.467	0.205
HGF	Mean Baseline	14	-0.218	0.455	-0.169	0.563
	W6D1 - folder change from Baseline	12	0.205	0.523	0.413	0.183
	Post Tx - folder change from Baseline	12	0.53	0.076	0.713	0.009
	Post Sx - folder change from Baseline	9	0.211	0.586	0.133	0.732
I-TAC	Mean Baseline	14	-0.511	0.062	-0.345	0.227
	W6D1 - folder change from Baseline	12	0.415	0.179	0.49	0.106
	Post Tx - folder change from Baseline	12	0.379	0.224	0.336	0.286
	Post Sx - folder change from Baseline	9	-0.253	0.512	-0.233	0.546
IGF-I	Mean Baseline	14	0.067	0.821	0.086	0.771
	W6D1 - folder change from Baseline	12	0.275	0.387	0.308	0.331
	Post Tx - folder change from Baseline	12	-0.115	0.722	-0.168	0.602
	Post Sx - folder change from Baseline	9	0.187	0.63	0.183	0.637
IP-10	Mean Baseline	14	-0.017	0.954	-0.068	0.817
	W6D1 - folder change from Baseline	12	0.348	0.268	0.119	0.713
	Post Tx - folder change from Baseline	12	0.024	0.94	-0.105	0.746
	Post Sx - folder change from Baseline	9	-0.161	0.68	-0.267	0.488
MCP-1	Mean Baseline	13	-0.12	0.696	-0.099	0.748
	W6D1 - folder change from Baseline	11	0.068	0.843	0.209	0.537
	Post Tx - folder change from Baseline	11	0.293	0.382	0.145	0.67
	Post Sx - folder change from Baseline	8	-0.164	0.698	-0.071	0.867
MCP-2	Mean Baseline	14	0.455	0.102	0.424	0.131
	W6D1 - folder change from Baseline	12	0.093	0.774	0.273	0.391
	Post Tx - folder change from Baseline	12	0.492	0.104	0.399	0.199
	Post Sx - folder change from Baseline	9	-0.059	0.88	-0.15	0.7
MCP-8	Mean Baseline	1	-	-	-	-
	W6D1 - folder change from Baseline	1	-	-	-	-
	Post Tx - folder change from Baseline	1	-	-	-	-
	Post Sx - folder change from Baseline	1	-	-	-	-
MIG	Mean Baseline	14	-0.353	0.216	-0.552	0.041
	W6D1 - folder change from Baseline	12	0.345	0.272	0.014	0.966
	Post Tx - folder change from Baseline	12	0.222	0.487	0.014	0.966
	Post Sx - folder change from Baseline	9	0.045	0.909	-0.367	0.332
MIP-1a	Mean Baseline	14	-0.294	0.308	-0.235	0.418
	W6D1 - folder change from Baseline	12	-0.059	0.856	-0.126	0.697
	Post Tx - folder change from Baseline	12	0.617	0.033	0.455	0.138
	Post Sx - folder change from Baseline	9	-0.339	0.372	-0.417	0.265
Rantes	Mean Baseline	14	-0.108	0.713	-0.125	0.67
	W6D1 - folder change from Baseline	12	0.224	0.484	0.476	0.118
	Post Tx - folder change from Baseline	12	0.538	0.071	0.72	0.008
	Post Sx - folder change from Baseline	9	-0.11	0.778	0.067	0.865
S100A8	Mean Baseline	14	0.274	0.344	-0.077	0.793
	W6D1 - folder change from Baseline	12	0.029	0.928	0.195	0.544
	Post Tx - folder change from Baseline	12	0.515	0.087	0.511	0.089
	Post Sx - folder change from Baseline	9	0.121	0.756	0.026	0.947
Tie-2	Mean Baseline	14	-0.187	0.521	-0.147	0.615
	W6D1 - folder change from Baseline	12	-0.161	0.617	-0.063	0.846
	Post Tx - folder change from Baseline	12	0.355	0.257	0.336	0.286
	Post Sx - folder change from Baseline	9	0.309	0.418	0.367	0.332
VEGF	Mean Baseline	14	-0.401	0.155	-0.244	0.401
	W6D1 - folder change from Baseline	12	0.708	0.01	0.72	0.008
	Post Tx - folder change from Baseline	12	0.512	0.089	0.462	0.131
	Post Sx - folder change from Baseline	9	0.045	0.909	0	1
VEGF-C	Mean Baseline	14	0.248	0.393	0.341	0.233
	W6D1 - folder change from Baseline	12	0.13	0.687	0.266	0.404
	Post Tx - folder change from Baseline	12	0.382	0.22	0.329	0.297
	Post Sx - folder change from Baseline	9	-0.223	0.565	0.033	0.932
VEGF-R2	Mean Baseline	14	0.626	0.017	0.6	0.023
	W6D1 - folder change from Baseline	12	-0.473	0.12	-0.559	0.059
	Post Tx - folder change from Baseline	12	-0.271	0.395	-0.399	0.199
	Post Sx - folder change from Baseline	9	0.122	0.754	-0.1	0.798
c-MET	Mean Baseline	14	-0.016	0.956	0.029	0.923
	W6D1 - folder change from Baseline	12	-0.453	0.139	-0.559	0.059
	Post Tx - folder change from Baseline	12	-0.231	0.469	-0.203	0.527
	Post Sx - folder change from Baseline	9	-0.234	0.544	-0.117	0.765

## Sheet: Supplementary Table 6
Supplementary Table 6. Summary of Wilcoxon Paired Rank Test on Absolute Value of FACS Markers
Markers	Covariate	P-value summary	P-value
	Baseline vs. W6D1	ns	0.1055
CD4+	Baseline vs. Post Tx	ns	0.1694
	Baseline vs. Post Sx	ns	0.5703
	Baseline vs. W6D1	ns	0.7002
Ki67+ of CD4+	Baseline vs. Post Tx	ns	0.6221
	Baseline vs. Post Sx	ns	0.2148
	Baseline vs. W6D1	ns	>0.9999
HLA-DR+CD38+ of CD4+	Baseline vs. Post Tx	ns	0.7471
	Baseline vs. Post Sx	ns	0.3594
	Baseline vs. W6D1	ns	0.2783
CD4_CM	Baseline vs. Post Tx	ns	0.3804
	Baseline vs. Post Sx	ns	0.1641
	Baseline vs. W6D1	ns	0.5938
CD4_Naive	Baseline vs. Post Tx	ns	0.9658
	Baseline vs. Post Sx	ns	>0.9999
	Baseline vs. W6D1	ns	0.9688
CD4_EMRA	Baseline vs. Post Tx	ns	0.5313
	Baseline vs. Post Sx	*	0.0391
	Baseline vs. W6D1	ns	0.083
CD4_EM	Baseline vs. Post Tx	ns	0.5693
	Baseline vs. Post Sx	ns	0.4258
	Baseline vs. W6D1	**	0.0049
Tregs	Baseline vs. Post Tx	ns	0.2661
	Baseline vs. Post Sx	ns	0.4258
	Baseline vs. W6D1	**	0.0049
CD8+	Baseline vs. Post Tx	ns	0.4238
	Baseline vs. Post Sx	ns	0.0781
	Baseline vs. W6D1	ns	0.2402
Ki67+ of CD8+	Baseline vs. Post Tx	ns	0.3804
	Baseline vs. Post Sx	ns	0.5508
	Baseline vs. W6D1	ns	0.1748
HLA-DR+CD38+ of CD8+	Baseline vs. Post Tx	ns	0.7334
	Baseline vs. Post Sx	ns	0.9102
	Baseline vs. W6D1	ns	0.4648
CD8_CM	Baseline vs. Post Tx	ns	0.7192
	Baseline vs. Post Sx	ns	0.6523
	Baseline vs. W6D1	ns	0.9658
CD8_Naive	Baseline vs. Post Tx	ns	0.7334
	Baseline vs. Post Sx	ns	0.6523
	Baseline vs. W6D1	ns	0.3203
CD8_EMRA	Baseline vs. Post Tx	ns	0.9697
	Baseline vs. Post Sx	ns	0.1289
	Baseline vs. W6D1	ns	0.1016
CD8_EM	Baseline vs. Post Tx	ns	0.4697
	Baseline vs. Post Sx	ns	0.0547
	Baseline vs. W6D1	ns	0.0771
NK+	Baseline vs. Post Tx	ns	0.3101
	Baseline vs. Post Sx	ns	>0.9999
	Baseline vs. W6D1	ns	0.8501
CD19+	Baseline vs. Post Tx	ns	>0.9999
	Baseline vs. Post Sx	ns	0.7344
	Baseline vs. W6D1	ns	0.8501
CD20+	Baseline vs. Post Tx	ns	>0.9999
	Baseline vs. Post Sx	ns	0.7344
	Baseline vs. W6D1	ns	0.8501
CD38+	Baseline vs. Post Tx	ns	0.8501
	Baseline vs. Post Sx	ns	0.1641
	Baseline vs. W6D1	ns	0.6772
CD71+	Baseline vs. Post Tx	ns	0.8501
	Baseline vs. Post Sx	ns	0.8203
	Baseline vs. W6D1	***	0.0005
Classical monocyte	Baseline vs. Post Tx	ns	0.1514
	Baseline vs. Post Sx	ns	0.4961
	Baseline vs. W6D1	ns	0.1099
Intermediate monocyte	Baseline vs. Post Tx	ns	0.2036
	Baseline vs. Post Sx	ns	>0.9999
	Baseline vs. W6D1	ns	0.5557
Non-classical monocyte	Baseline vs. Post Tx	ns	0.6079
	Baseline vs. Post Sx	ns	>0.9999
	Baseline vs. W6D1	***	0.0005
Dendritic cells (DCs)	Baseline vs. Post Tx	*	0.022
	Baseline vs. Post Sx	ns	0.5508

## Sheet: Supplementary Table 7
Supplementary Table 7. Summary of Wilcoxon Paired Rank Test on Fold Change Value of FACS Markers
Markers	Covariate	P-value summary	P-value
	Baseline vs. W6D1	*	0.0137
CD4+	Baseline vs. Post Tx	ns	0.1763
	Baseline vs. Post Sx	ns	0.5703
	Baseline vs. W6D1	ns	0.4648
Ki67+ of CD4+	Baseline vs. Post Tx	ns	0.8501
	Baseline vs. Post Sx	ns	0.5703
	Baseline vs. W6D1	ns	0.6953
HLA-DR+CD38+ of CD4+	Baseline vs. Post Tx	ns	0.3394
	Baseline vs. Post Sx	ns	0.4258
	Baseline vs. W6D1	**	0.0049
Tregs	Baseline vs. Post Tx	ns	0.1294
	Baseline vs. Post Sx	ns	0.3594
	Baseline vs. W6D1	**	0.0049
CD8	Baseline vs. Post Tx	ns	0.5693
	Baseline vs. Post Sx	ns	0.0781
	Baseline vs. W6D1	ns	0.1475
Ki67+ of CD8+	Baseline vs. Post Tx	ns	0.6221
	Baseline vs. Post Sx	ns	0.8203
	Baseline vs. W6D1	ns	0.083
HLA-DR+CD38+ of CD8+	Baseline vs. Post Tx	ns	0.9097
	Baseline vs. Post Sx	ns	0.8203
	Baseline vs. W6D1	ns	0.1099
NK+	Baseline vs. Post Tx	ns	0.5693
	Baseline vs. Post Sx	ns	>0.9999
	Baseline vs. W6D1	ns	0.4697
CD19+	Baseline vs. Post Tx	ns	0.4238
	Baseline vs. Post Sx	ns	>0.9999
	Baseline vs. W6D1	ns	0.6221
CD20+	Baseline vs. Post Tx	ns	0.6772
	Baseline vs. Post Sx	ns	>0.9999
	Baseline vs. W6D1	ns	0.9102
CD38+	Baseline vs. Post Tx	ns	0.4922
	Baseline vs. Post Sx	ns	0.1563
	Baseline vs. W6D1	ns	0.4238
CD71+	Baseline vs. Post Tx	ns	0.9697
	Baseline vs. Post Sx	ns	0.7344
	Baseline vs. W6D1	***	0.0005
Classical monocyte	Baseline vs. Post Tx	ns	0.2036
	Baseline vs. Post Sx	ns	0.5703
	Baseline vs. W6D1	ns	0.064
Intermediate monocyte	Baseline vs. Post Tx	ns	0.6221
	Baseline vs. Post Sx	ns	0.9102
	Baseline vs. W6D1	ns	0.5693
Non-classical monocyte	Baseline vs. Post Tx	ns	0.4238
	Baseline vs. Post Sx	ns	>0.9999
	Baseline vs. W6D1	***	0.0005
Dendritic cells (DCs)	Baseline vs. Post Tx	ns	0.2266
	Baseline vs. Post Sx	ns	0.5703

## Sheet: Supplementary Table 8
Supplementary Table 8. Summary of FACS with Response
Biomarkers	Covariate	Total N=98 (100%)	PR N=35 (35.71%)	SD N=63 (64.29%)	P-value**
CD14+ Monocytes	Mean Baseline				0.003*
	Total N	14	5	9
	Mean (Std Dev)	22.58 (9.47)	15.02 (3.98)	26.78 (9.08)
	Median (Q1-Q3)	20.85 (17.7-23)	17.4 (12.7-17.7)	22.7 (21-28)
	Min - Max	9.1-44.9	9.1-18.2	19.3-44.9
	W6D1 - folder change from Baseline				0.308*
	Total N	12	4	8
	Mean (Std Dev)	0.44 (0.09)	0.48 (0.05)	0.42 (0.1)
	Median (Q1-Q3)	0.48 (0.38-0.51)	0.5 (0.45-0.52)	0.44 (0.34-0.5)
	Min - Max	0.26-0.56	0.41-0.52	0.26-0.56
	N missing	2	1	1
	Post Tx - folder change from Baseline				0.042*
	Total N	12	4	8
	Mean (Std Dev)	0.85 (0.39)	1.19 (0.24)	0.69 (0.34)
	Median (Q1-Q3)	0.85 (0.51-1.19)	1.17 (0.98-1.39)	0.6 (0.43-0.95)
	Min - Max	0.33-1.45	0.97-1.45	0.33-1.2
	N missing	2	1	1
	Post Sx - folder change from Baseline				0.806*
	Total N	9	4	5
	Mean (Std Dev)	1.05 (0.49)	1.14 (0.75)	0.97 (0.17)
	Median (Q1-Q3)	0.91 (0.89-1.04)	0.92 (0.7-1.58)	0.9 (0.89-1.04)
	Min - Max	0.49-2.23	0.49-2.23	0.8-1.22
	N missing	5	1	4
CD4+/CD38+DR	Mean Baseline				0.947*
	Total N	14	5	9
	Mean (Std Dev)	0.79 (0.49)	0.74 (0.39)	0.82 (0.56)
	Median (Q1-Q3)	0.66 (0.46-1.04)	0.52 (0.51-0.83)	0.7 (0.39-1.04)
	Min - Max	0.29-1.97	0.46-1.4	0.29-1.97
	W6D1 - folder change from Baseline				0.131*
	Total N	11	4	7
	Mean (Std Dev)	1.11 (0.6)	1.36 (0.3)	0.97 (0.7)
	Median (Q1-Q3)	1 (0.63-1.53)	1.4 (1.12-1.6)	0.97 (0.35-1.1)
	Min - Max	0.35-2.41	0.98-1.66	0.35-2.41
	N missing	3	1	2
	Post Tx - folder change from Baseline				0.61*
	Total N	12	4	8
	Mean (Std Dev)	1.15 (0.63)	1.06 (0.77)	1.19 (0.61)
	Median (Q1-Q3)	1.21 (0.45-1.61)	1.01 (0.4-1.73)	1.21 (0.64-1.6)
	Min - Max	0.39-2.17	0.39-1.85	0.45-2.17
	N missing	2	1	1
	Post Sx - folder change from Baseline				0.221*
	Total N	9	4	5
	Mean (Std Dev)	0.91 (0.47)	0.73 (0.42)	1.05 (0.5)
	Median (Q1-Q3)	0.67 (0.54-1.32)	0.55 (0.48-0.99)	0.95 (0.67-1.32)
	Min - Max	0.47-1.76	0.47-1.35	0.54-1.76
	N missing	5	1	4
CD4+/Ki67	Mean Baseline				0.124*
	Total N	14	5	9
	Mean (Std Dev)	2.51 (0.88)	2.05 (0.95)	2.76 (0.78)
	Median (Q1-Q3)	2.37 (2.14-3.5)	2.14 (1.41-2.19)	2.95 (2.22-3.5)
	Min - Max	1.03-3.66	1.03-3.5	1.31-3.66
	W6D1 - folder change from Baseline				0.85*
	Total N	11	4	7
	Mean (Std Dev)	1.28 (0.82)	1.18 (0.26)	1.34 (1.04)
	Median (Q1-Q3)	1.23 (0.63-1.41)	1.25 (1.02-1.34)	1.11 (0.56-1.7)
	Min - Max	0.53-3.46	0.81-1.41	0.53-3.46
	N missing	3	1	2
	Post Tx - folder change from Baseline				0.497*
	Total N	12	4	8
	Mean (Std Dev)	0.97 (0.51)	1.11 (0.57)	0.9 (0.51)
	Median (Q1-Q3)	0.88 (0.49-1.35)	1.17 (0.66-1.57)	0.81 (0.49-1.19)
	Min - Max	0.36-1.9	0.42-1.7	0.36-1.9
	N missing	2	1	1
	Post Sx - folder change from Baseline				0.624*
	Total N	9	4	5
	Mean (Std Dev)	0.96 (0.65)	0.7 (0.2)	1.17 (0.83)
	Median (Q1-Q3)	0.76 (0.68-0.86)	0.76 (0.56-0.84)	0.76 (0.68-1.12)
	Min - Max	0.43-2.61	0.43-0.86	0.66-2.61
	N missing	5	1	4
CD71	Mean Baseline				0.641*
	Total N	14	5	9
	Mean (Std Dev)	4.6 (4.24)	6.2 (6.72)	3.71 (2.02)
	Median (Q1-Q3)	3.32 (2.04-5.34)	3.29 (2.34-5.31)	3.34 (1.91-5.34)
	Min - Max	1.69-18	2.04-18	1.69-6.7
	W6D1 - folder change from Baseline				0.089*
	Total N	12	4	8
	Mean (Std Dev)	1.25 (0.75)	1.55 (0.43)	1.1 (0.85)
	Median (Q1-Q3)	0.92 (0.62-1.81)	1.64 (1.21-1.88)	0.75 (0.56-1.34)
	Min - Max	0.55-2.93	0.97-1.94	0.55-2.93
	N missing	2	1	1
	Post Tx - folder change from Baseline				0.174*
	Total N	12	4	8
	Mean (Std Dev)	1.18 (0.92)	1.53 (1.02)	1.01 (0.88)
	Median (Q1-Q3)	0.84 (0.52-1.94)	1.3 (0.78-2.28)	0.69 (0.42-1.56)
	Min - Max	0.23-2.93	0.59-2.93	0.23-2.52
	N missing	2	1	1
	Post Sx - folder change from Baseline				0.462*
	Total N	9	4	5
	Mean (Std Dev)	1.34 (0.79)	1.32 (0.53)	1.37 (1.02)
	Median (Q1-Q3)	1 (0.88-1.33)	1.16 (0.94-1.7)	0.94 (0.88-1.04)
	Min - Max	0.79-3.18	0.88-2.06	0.79-3.18
	N missing	5	1	4
CD8+/CD38+DR	Mean Baseline				0.548*
	Total N	14	5	9
	Mean (Std Dev)	1.85 (1.24)	1.51 (0.75)	2.04 (1.45)
	Median (Q1-Q3)	1.34 (0.94-2.47)	1.63 (0.94-2.15)	1.04 (0.97-3.4)
	Min - Max	0.51-4.13	0.56-2.27	0.51-4.13
	W6D1 - folder change from Baseline				0.089*
	Total N	11	4	7
	Mean (Std Dev)	1.5 (0.83)	2.05 (0.85)	1.19 (0.69)
	Median (Q1-Q3)	1.63 (0.73-2.05)	1.91 (1.46-2.64)	1.02 (0.6-1.96)
	Min - Max	0.36-3.2	1.18-3.2	0.36-2.05
	N missing	3	1	2
	Post Tx - folder change from Baseline				1*
	Total N	12	4	8
	Mean (Std Dev)	1.03 (0.81)	1.2 (0.98)	0.95 (0.77)
	Median (Q1-Q3)	0.68 (0.37-1.65)	1.2 (0.35-2.05)	0.68 (0.43-1.24)
	Min - Max	0.27-2.62	0.27-2.14	0.28-2.62
	N missing	2	1	1
	Post Sx - folder change from Baseline				1*
	Total N	9	4	5
	Mean (Std Dev)	1.15 (0.77)	1.08 (0.92)	1.2 (0.75)
	Median (Q1-Q3)	0.73 (0.58-1.62)	0.67 (0.57-1.59)	1.05 (0.58-1.62)
	Min - Max	0.5-2.45	0.53-2.45	0.5-2.27
	N missing	5	1	4
CD8+/Ki67	Mean Baseline				0.257*
	Total N	14	5	9
	Mean (Std Dev)	2.53 (1.12)	2.02 (0.99)	2.81 (1.14)
	Median (Q1-Q3)	2.18 (2.05-2.73)	2.05 (1.75-2.68)	2.22 (2.12-2.73)
	Min - Max	0.52-5.34	0.52-3.11	2.01-5.34
	W6D1 - folder change from Baseline				0.023*
	Total N	11	4	7
	Mean (Std Dev)	1.36 (0.79)	2.02 (0.85)	0.99 (0.48)
	Median (Q1-Q3)	1.31 (0.86-1.65)	1.75 (1.48-2.56)	1.02 (0.45-1.47)
	Min - Max	0.36-3.25	1.31-3.25	0.36-1.61
	N missing	3	1	2
	Post Tx - folder change from Baseline				0.234*
	Total N	12	4	8
	Mean (Std Dev)	0.97 (0.61)	1.25 (0.72)	0.83 (0.55)
	Median (Q1-Q3)	0.78 (0.49-1.39)	1.17 (0.71-1.79)	0.63 (0.47-1.1)
	Min - Max	0.3-2.17	0.48-2.17	0.3-1.92
	N missing	2	1	1
	Post Sx - folder change from Baseline				0.806*
	Total N	9	4	5
	Mean (Std Dev)	1.05 (0.51)	0.91 (0.27)	1.15 (0.66)
	Median (Q1-Q3)	0.81 (0.74-1.21)	0.82 (0.75-1.08)	0.81 (0.74-1.21)
	Min - Max	0.69-2.28	0.69-1.31	0.72-2.28
	N missing	5	1	4
DCs	Mean Baseline				0.205*
	Total N	14	5	9
	Mean (Std Dev)	0.85 (0.39)	0.98 (0.31)	0.77 (0.43)
	Median (Q1-Q3)	0.75 (0.56-1.21)	0.83 (0.76-1.26)	0.71 (0.51-0.86)
	Min - Max	0.23-1.67	0.68-1.37	0.23-1.67
	W6D1 - folder change from Baseline				0.308*
	Total N	12	4	8
	Mean (Std Dev)	0.33 (0.21)	0.35 (0.08)	0.33 (0.26)
	Median (Q1-Q3)	0.29 (0.17-0.41)	0.34 (0.29-0.41)	0.22 (0.15-0.43)
	Min - Max	0.14-0.87	0.27-0.45	0.14-0.87
	N missing	2	1	1
	Post Tx - folder change from Baseline				0.497*
	Total N	12	4	8
	Mean (Std Dev)	0.75 (0.7)	0.52 (0.3)	0.87 (0.83)
	Median (Q1-Q3)	0.44 (0.35-0.79)	0.42 (0.34-0.69)	0.54 (0.36-1.32)
	Min - Max	0.16-2.35	0.28-0.95	0.16-2.35
	N missing	2	1	1
	Post Sx - folder change from Baseline				0.086*
	Total N	9	4	5
	Mean (Std Dev)	1.68 (2.25)	0.63 (0.16)	2.51 (2.86)
	Median (Q1-Q3)	0.75 (0.59-0.96)	0.63 (0.5-0.77)	0.96 (0.75-2.9)
	Min - Max	0.46-7.35	0.46-0.81	0.59-7.35
	N missing	5	1	4
** The p-value is calculated by ANOVA test (parametric) or Kruskal-Wallis test (non-parametric) for numerical covariates, where appropriate.
* Non-parametric test: Kruskal-Wallis test is applied.

## Sheet: Supplementary Table 9
Supplementary Table 9. Summary of FACS with Tumor Shrink 20
			Tumor Shrink >=20% at Week 12
Biomarkers	Covariate	Total N=98 (100%)	Yes N=70 (71.43%)	No N=28 (28.57%)	P-value**
CD14+ Monocytes	Mean Baseline				0.12*
	Total N	14	10	4
	Mean (Std Dev)	22.58 (9.47)	20.15 (7.99)	28.65 (11.35)
	Median (Q1-Q3)	20.85 (17.7-23)	18.75 (17.4-22.7)	24.5 (20.85-36.45)
	Min - Max	9.1-44.9	9.1-39.1	20.7-44.9
	W6D1 - folder change from Baseline				1*
	Total N	12	8	4
	Mean (Std Dev)	0.44 (0.09)	0.44 (0.1)	0.45 (0.09)
	Median (Q1-Q3)	0.48 (0.38-0.51)	0.49 (0.36-0.51)	0.44 (0.38-0.52)
	Min - Max	0.26-0.56	0.26-0.52	0.35-0.56
	N missing	2	2	0
	Post Tx - folder change from Baseline				0.126*
	Total N	12	8	4
	Mean (Std Dev)	0.85 (0.39)	0.99 (0.4)	0.58 (0.14)
	Median (Q1-Q3)	0.85 (0.51-1.19)	1.09 (0.71-1.27)	0.6 (0.48-0.68)
	Min - Max	0.33-1.45	0.33-1.45	0.41-0.73
	N missing	2	2	0
	Post Sx - folder change from Baseline				1*
	Total N	9	6	3
	Mean (Std Dev)	1.05 (0.49)	1.07 (0.6)	1 (0.19)
	Median (Q1-Q3)	0.91 (0.89-1.04)	0.92 (0.8-1.04)	0.9 (0.89-1.22)
	Min - Max	0.49-2.23	0.49-2.23	0.89-1.22
	N missing	5	4	1
CD4+/CD38+DR	Mean Baseline				0.322*
	Total N	14	10	4
	Mean (Std Dev)	0.79 (0.49)	0.87 (0.53)	0.61 (0.34)
	Median (Q1-Q3)	0.66 (0.46-1.04)	0.67 (0.51-1.36)	0.55 (0.34-0.87)
	Min - Max	0.29-1.97	0.3-1.97	0.29-1.04
	W6D1 - folder change from Baseline				0.683*
	Total N	11	8	3
	Mean (Std Dev)	1.11 (0.6)	1.19 (0.69)	0.91 (0.25)
	Median (Q1-Q3)	1 (0.63-1.53)	1.12 (0.66-1.6)	1 (0.63-1.1)
	Min - Max	0.35-2.41	0.35-2.41	0.63-1.1
	N missing	3	2	1
	Post Tx - folder change from Baseline				0.61*
	Total N	12	8	4
	Mean (Std Dev)	1.15 (0.63)	1.09 (0.61)	1.26 (0.77)
	Median (Q1-Q3)	1.21 (0.45-1.61)	1.21 (0.43-1.61)	1.2 (0.64-1.88)
	Min - Max	0.39-2.17	0.39-1.85	0.46-2.17
	N missing	2	2	0
	Post Sx - folder change from Baseline				0.439*
	Total N	9	6	3
	Mean (Std Dev)	0.91 (0.47)	0.82 (0.41)	1.08 (0.62)
	Median (Q1-Q3)	0.67 (0.54-1.32)	0.65 (0.48-1.32)	0.95 (0.54-1.76)
	Min - Max	0.47-1.76	0.47-1.35	0.54-1.76
	N missing	5	4	1
CD4+/Ki67	Mean Baseline				0.832*
	Total N	14	10	4
	Mean (Std Dev)	2.51 (0.88)	2.48 (0.91)	2.58 (0.93)
	Median (Q1-Q3)	2.37 (2.14-3.5)	2.21 (2.14-3.5)	2.75 (1.92-3.24)
	Min - Max	1.03-3.66	1.03-3.66	1.31-3.5
	W6D1 - folder change from Baseline				1*
	Total N	11	8	3
	Mean (Std Dev)	1.28 (0.82)	1.33 (0.93)	1.15 (0.53)
	Median (Q1-Q3)	1.23 (0.63-1.41)	1.25 (0.68-1.41)	1.11 (0.63-1.7)
	Min - Max	0.53-3.46	0.53-3.46	0.63-1.7
	N missing	3	2	1
	Post Tx - folder change from Baseline				0.396*
	Total N	12	8	4
	Mean (Std Dev)	0.97 (0.51)	1.09 (0.57)	0.74 (0.3)
	Median (Q1-Q3)	0.88 (0.49-1.35)	1.08 (0.59-1.57)	0.68 (0.49-0.98)
	Min - Max	0.36-1.9	0.36-1.9	0.47-1.1
	N missing	2	2	0
	Post Sx - folder change from Baseline				0.606*
	Total N	9	6	3
	Mean (Std Dev)	0.96 (0.65)	1.03 (0.79)	0.82 (0.26)
	Median (Q1-Q3)	0.76 (0.68-0.86)	0.79 (0.7-0.86)	0.68 (0.66-1.12)
	Min - Max	0.43-2.61	0.43-2.61	0.66-1.12
	N missing	5	4	1
CD71	Mean Baseline				0.671*
	Total N	14	10	4
	Mean (Std Dev)	4.6 (4.24)	5.16 (4.89)	3.19 (1.56)
	Median (Q1-Q3)	3.32 (2.04-5.34)	3.63 (2.04-6.44)	2.76 (2.05-4.34)
	Min - Max	1.69-18	1.69-18	1.91-5.34
	W6D1 - folder change from Baseline				0.062*
	Total N	12	8	4
	Mean (Std Dev)	1.25 (0.75)	1.52 (0.78)	0.7 (0.17)
	Median (Q1-Q3)	0.92 (0.62-1.81)	1.63 (0.83-1.88)	0.69 (0.56-0.84)
	Min - Max	0.55-2.93	0.56-2.93	0.55-0.87
	N missing	2	2	0
	Post Tx - folder change from Baseline				0.308*
	Total N	12	8	4
	Mean (Std Dev)	1.18 (0.92)	1.31 (0.95)	0.93 (0.92)
	Median (Q1-Q3)	0.84 (0.52-1.94)	0.89 (0.58-2.08)	0.62 (0.3-1.56)
	Min - Max	0.23-2.93	0.47-2.93	0.23-2.25
	N missing	2	2	0
	Post Sx - folder change from Baseline				0.121*
	Total N	9	6	3
	Mean (Std Dev)	1.34 (0.79)	1.57 (0.91)	0.9 (0.13)
	Median (Q1-Q3)	1 (0.88-1.33)	1.16 (0.94-2.06)	0.88 (0.79-1.04)
	Min - Max	0.79-3.18	0.88-3.18	0.79-1.04
	N missing	5	4	1
CD8+/CD38+DR	Mean Baseline				1*
	Total N	14	10	4
	Mean (Std Dev)	1.85 (1.24)	1.69 (1.02)	2.24 (1.79)
	Median (Q1-Q3)	1.34 (0.94-2.47)	1.34 (0.97-2.27)	2.17 (0.72-3.77)
	Min - Max	0.51-4.13	0.56-3.92	0.51-4.13
	W6D1 - folder change from Baseline				0.54*
	Total N	11	8	3
	Mean (Std Dev)	1.5 (0.83)	1.61 (0.88)	1.22 (0.75)
	Median (Q1-Q3)	1.63 (0.73-2.05)	1.69 (0.96-2.02)	1.02 (0.6-2.05)
	Min - Max	0.36-3.2	0.36-3.2	0.6-2.05
	N missing	3	2	1
	Post Tx - folder change from Baseline				0.234*
	Total N	12	8	4
	Mean (Std Dev)	1.03 (0.81)	0.91 (0.79)	1.27 (0.92)
	Median (Q1-Q3)	0.68 (0.37-1.65)	0.5 (0.29-1.65)	0.92 (0.68-1.86)
	Min - Max	0.27-2.62	0.27-2.14	0.63-2.62
	N missing	2	2	0
	Post Sx - folder change from Baseline				0.121*
	Total N	9	6	3
	Mean (Std Dev)	1.15 (0.77)	0.9 (0.76)	1.65 (0.61)
	Median (Q1-Q3)	0.73 (0.58-1.62)	0.6 (0.53-0.73)	1.62 (1.05-2.27)
	Min - Max	0.5-2.45	0.5-2.45	1.05-2.27
	N missing	5	4	1
CD8+/Ki67	Mean Baseline				0.09*
	Total N	14	10	4
	Mean (Std Dev)	2.53 (1.12)	2.13 (0.7)	3.53 (1.44)
	Median (Q1-Q3)	2.18 (2.05-2.73)	2.1 (2.01-2.68)	3.33 (2.39-4.67)
	Min - Max	0.52-5.34	0.52-3.11	2.12-5.34
	W6D1 - folder change from Baseline				0.221*
	Total N	11	8	3
	Mean (Std Dev)	1.36 (0.79)	1.52 (0.84)	0.95 (0.56)
	Median (Q1-Q3)	1.31 (0.86-1.65)	1.46 (1.02-1.75)	1.02 (0.36-1.47)
	Min - Max	0.36-3.25	0.45-3.25	0.36-1.47
	N missing	3	2	1
	Post Tx - folder change from Baseline				0.497*
	Total N	12	8	4
	Mean (Std Dev)	0.97 (0.61)	1.03 (0.6)	0.85 (0.71)
	Median (Q1-Q3)	0.78 (0.49-1.39)	0.88 (0.61-1.39)	0.52 (0.47-1.23)
	Min - Max	0.3-2.17	0.3-2.17	0.44-1.92
	N missing	2	2	0
	Post Sx - folder change from Baseline				1*
	Total N	9	6	3
	Mean (Std Dev)	1.05 (0.51)	1.11 (0.62)	0.92 (0.26)
	Median (Q1-Q3)	0.81 (0.74-1.21)	0.82 (0.72-1.31)	0.81 (0.74-1.21)
	Min - Max	0.69-2.28	0.69-2.28	0.74-1.21
	N missing	5	4	1
DCs	Mean Baseline				0.322*
	Total N	14	10	4
	Mean (Std Dev)	0.85 (0.39)	0.92 (0.44)	0.66 (0.16)
	Median (Q1-Q3)	0.75 (0.56-1.21)	0.8 (0.68-1.26)	0.64 (0.54-0.79)
	Min - Max	0.23-1.67	0.23-1.67	0.51-0.86
	W6D1 - folder change from Baseline				0.308*
	Total N	12	8	4
	Mean (Std Dev)	0.33 (0.21)	0.37 (0.22)	0.25 (0.18)
	Median (Q1-Q3)	0.29 (0.17-0.41)	0.31 (0.27-0.41)	0.17 (0.15-0.35)
	Min - Max	0.14-0.87	0.14-0.87	0.14-0.53
	N missing	2	2	0
	Post Tx - folder change from Baseline				0.865*
	Total N	12	8	4
	Mean (Std Dev)	0.75 (0.7)	0.88 (0.84)	0.5 (0.17)
	Median (Q1-Q3)	0.44 (0.35-0.79)	0.44 (0.34-1.47)	0.53 (0.36-0.63)
	Min - Max	0.16-2.35	0.16-2.35	0.29-0.63
	N missing	2	2	0
	Post Sx - folder change from Baseline				1*
	Total N	9	6	3
	Mean (Std Dev)	1.68 (2.25)	2.13 (2.72)	0.77 (0.19)
	Median (Q1-Q3)	0.75 (0.59-0.96)	0.77 (0.54-2.9)	0.75 (0.59-0.96)
	Min - Max	0.46-7.35	0.46-7.35	0.59-0.96
	N missing	5	4	1
** The p-value is calculated by ANOVA test (parametric) or Kruskal-Wallis test (non-parametric) for numerical covariates, where appropriate.
* Non-parametric test: Kruskal-Wallis test is applied.

[truncated: 2 more sheets: Supplementary Table 10, Supplementary Table 11]
